1

2

**Structures of TRPM5 channel elucidate mechanism of activation and inhibition**

3

Zheng Ruan<sup>1\*</sup>, Emery Haley<sup>1\*</sup>, Ian J. Orozco<sup>1\*</sup>, Mark Sabat<sup>2</sup>, Richard Myers<sup>2</sup>, Rebecca Roth<sup>1</sup>,

4

Juan Du<sup>1#</sup> & Wei Lü<sup>1#</sup>

5

1. Van Andel Institute, 333 Bostwick Ave., N.E., Grand Rapids, MI 49503

6

2. Takeda California Inc, 9625 Towne Centre Dr, San Diego, CA 92121

7

8

9

10 **#CORRESPONDING AUTHOR**

11 Correspondence and requests for materials should be addressed to J. D. (email: [juan.du@vai.org](mailto:juan.du@vai.org))

12 TEL: (616) 234-5358, FAX: 616-234-5170 or W. L. (email: [wei.lu@vai.org](mailto:wei.lu@vai.org)). TEL: (616) 234-

13 5022, FAX: 616-234-5170

14 \*These authors contributed equally to this work

15 **The Ca<sup>2+</sup>-activated TRPM5 channel plays an essential role in the perception of sweet, bitter,**  
16 **and umami stimuli in type II taste cells and in insulin secretion by pancreatic beta cells<sup>1-3</sup>.**  
17 **Interestingly, the voltage dependence of TRPM5 in taste bud cells depends on the**  
18 **intracellular Ca<sup>2+</sup> concentration<sup>4</sup>, yet the mechanism remains elusive. Here we report cryo-**  
19 **electron microscopy structures of the zebrafish TRPM5 in an apo closed state, a Ca<sup>2+</sup>-**  
20 **bound open state, and an antagonist-bound inhibited state, at resolutions up to 2.3 Å. We**  
21 **defined two novel ligand binding sites: a Ca<sup>2+</sup> binding site (Ca<sub>ICD</sub>) in the intracellular**  
22 **domain (ICD), and an antagonist binding site in the transmembrane domain (TMD) for a**  
23 **drug (NDNA) that regulates insulin and GLP-1 release<sup>5</sup>. The Ca<sub>ICD</sub> site is unique to**  
24 **TRPM5 and has two roles: shifting the voltage dependence toward negative membrane**  
25 **potential, and promoting Ca<sup>2+</sup> binding to the Ca<sub>TMD</sub> site that is conserved throughout Ca<sup>2+</sup>-**  
26 **sensitive TRPM channels<sup>6</sup>. Replacing glutamate 337 in the Ca<sub>ICD</sub> site with an alanine not**  
27 **only abolished Ca<sup>2+</sup> binding to Ca<sub>ICD</sub> but also reduced Ca<sup>2+</sup> binding affinity to Ca<sub>TMD</sub>,**  
28 **suggesting a cooperativity between the two sites. We have defined mechanisms underlying**  
29 **channel activation and inhibition. Conformational changes initialized from both Ca<sup>2+</sup> sites,**  
30 **70 Å apart, are propagated to the ICD–TMD interface and cooperatively open the ion-**  
31 **conducting pore. The antagonist NDNA wedges into the space between the S1-S4 domain**  
32 **and pore domain, stabilizing the TMD in an apo-like closed state. Our results lay the**  
33 **foundation for understanding the voltage-dependent TRPM channels and developing new**  
34 **therapeutic agents to treat metabolic disorders.**

35

## 36 **Introduction**

37 Taste perception is one of the fundamental chemosensations in mammals, detecting the  
38 availability and the quality of food by converting the signal from tastants into electrical signals  
39 that the brain can interpret. Highly expressed in type II taste bud cells, the TRPM5 channel has  
40 been considered a key player in sensing sweet, umami, and bitter stimuli<sup>1,7</sup>. TRPM5 is activated  
41 upon the elevation of cytoplasmic  $\text{Ca}^{2+}$  concentration that is caused by the binding of tastants to  
42 the taste receptors<sup>8</sup>. Activated TRPM5 then depolarizes the membrane and causes the CALHM1  
43 channel to release the neurotransmitter ATP, which binds to the downstream P2X receptors that  
44 trigger the action potential of gustatory neurons, thus conveying taste information to the brain<sup>8,9</sup>.  
45 TRPM5 also participates in other physiological processes in diverse cell types in a similar  
46 manner. For example, it is involved in insulin secretion by pancreatic beta cells<sup>2,3</sup> and in the  
47 immune response of tuft cells<sup>10</sup>. Thus, TRPM5 has broad implications for metabolic syndromes  
48 and immune disorders, and it is a potential drug target for the treatment of metabolic disorders  
49 such as obesity and type 2 diabetes<sup>11</sup>.

50 The transient receptor potential superfamily, melastatin subfamily (TRPM) consists of  
51 eight family members (TRPM1-8) that have diverse functional properties<sup>12</sup>. While most TRP  
52 family members are nonselective cation channels that are permeable to  $\text{Na}^+$  and  $\text{Ca}^{2+}$ , TRPM5  
53 and TRPM4 are the only two that are monovalent cation–selective and impermeable to  $\text{Ca}^{2+}$   
54 (Ref<sup>13–15</sup>). Moreover, TRPM5 and TRPM4 share substantial sequence similarity, and both are  
55 activated by intracellular  $\text{Ca}^{2+}$  in a voltage- and temperature-dependent manner; therefore, they  
56 have been classified as close homologs<sup>16</sup>. However, their biophysical properties vary with  
57 respect to  $\text{Ca}^{2+}$  sensitivity and ligand specificity, and the molecular basis for these differences is  
58 unknown<sup>17</sup>. For instance, TRPM5 is roughly 20-fold more sensitive to  $\text{Ca}^{2+}$  than TRPM4<sup>17</sup>.

59 TRPM4 is inhibited by ATP, and its voltage dependence is modulated by decavanadate, while  
60 TRPM5 is insensitive to these ligands<sup>17,18</sup>. By contrast, TRPM5, but not TRPM4, is modulated  
61 by the sweetener stevioside<sup>19</sup>. TRPM5 has also been an attractive pharmaceutical target for  
62 treating metabolic syndromes. For example, a family of small molecule TRPM5 inhibitors,  
63 including N'-(3,4-dimethoxybenzylidene)-2-(naphthalen-1-yl)acetohydrazide (NDNA), has been  
64 invented. These inhibitors have the potential to treat type II diabetes by enhancing insulin release  
65 and GLP-1 release<sup>5</sup>, which is contrary to the result of TRPM5 KO mice experiments<sup>3</sup>. Recently,  
66 structures of the voltage-dependent TRPM4 and TRPM8 channels have been reported<sup>20–25</sup>, but  
67 none have been captured in an active open state, preventing a detailed understanding of their  
68 gating mechanisms. To understand the molecular mechanisms by which Ca<sup>2+</sup> activates and  
69 antagonist NDNA inhibits TRPM5, we performed electrophysiological and structural studies on  
70 TRPM5.

### 71 **Channel function, overall structures, and the ion-conducting pore**

72 The zebrafish TRPM5 is highly sensitive to Ca<sup>2+</sup>, and 1 μM Ca<sup>2+</sup> elicited a robust  
73 outward rectifying current in an excised inside-out patch (Extended Data Fig. 1a, k, u–w).  
74 Interestingly, the outward rectification of the TRPM5 currents apparently depends on the Ca<sup>2+</sup>  
75 concentration. That is, at low Ca<sup>2+</sup> concentration, the activation of TRPM5 requires membrane  
76 depolarization, whereas at high Ca<sup>2+</sup> concentration, TRPM5 becomes markedly less voltage-  
77 dependent, having a nearly linear current–voltage relation (Fig. 1a; Extended Data Fig. 1a, k;  
78 Supplementary Fig. 1a). This unique property is conserved in human TRPM5 but not in its  
79 closest homologue TRPM4 (Extended Data Fig. 1b, h, l, r, u–w)<sup>21</sup>. Moreover, this shift in voltage  
80 dependence was previously observed with native TRPM5 currents in taste cells<sup>4</sup>. Our data imply



81 that besides being an agonist,  $\text{Ca}^{2+}$  may also serve as a modulator to tune the voltage dependence  
82 of TRPM5.

83 We solved the structures of zebrafish TRPM5 in both glyco-diosgenin (GDN) and lipid  
84 nanodiscs (Extended Data Figs. 2–5; Extended Table 1; Supplementary Fig. 2); the structures  
85 were virtually indistinguishable (Supplementary Fig. 2g). We focused on the TRPM5 in GDN  
86 because it produced cryo-EM maps of higher resolution. The apo,  $\text{Ca}^{2+}$ -bound, and NDNA/ $\text{Ca}^{2+}$ -  
87 bound structures were determined in the presence of 1 mM EDTA, 5 mM  $\text{Ca}^{2+}$  and 0.5 mM  
88 NDNA/5mM  $\text{Ca}^{2+}$  and had estimated resolutions of 2.9, 2.3, and 2.8 Å, respectively (Extended  
89 Data Figs. 3o, 4c, 5c). The maps were of excellent quality (Fig. 1b; Extended Data Fig. 6), which  
90 allowed us to *de novo* model nearly the entire protein (Fig. 1c-d), to identify two bound  $\text{Ca}^{2+}$  ions  
91 and a NDNA molecule in each subunit (Fig. 1c-d), two water molecules coordinating the  $\text{Ca}^{2+}$  in  
92 the transmembrane domain (TMD) and two water molecule in the pore loop region (Extended  
93 Data Fig. 7), and to unambiguously define the channel gate and the selectivity filter (Extended  
94 Data Fig. 7c-g).

95 The tetrameric TRPM5 is assembled with a TMD formed by six transmembrane helices  
96 and four characteristic intracellular melastatin homology regions (MHR1/2 and MHR3/4)  
97 (Extended Data Fig. 3e, f). Despite being the closest homologue to TRPM4, TRPM5 has a  
98 distinct monomeric structure, with the MHR1/2 domain tilting toward the TMD, resulting in a  
99 more compact tetrameric assembly and a different intersubunit interface (Fig. 1c; Extended Data  
100 Fig. 8a). Besides the conserved  $\text{Ca}^{2+}$  site in the TMD ( $\text{Ca}_{\text{TMD}}$ ), as observed in the structures of  
101 TRPM2, TRPM4, and TRPM8, we observed a novel  $\text{Ca}^{2+}$  binding site ( $\text{Ca}_{\text{ICD}}$ ) in the intracellular  
102 cytosolic domain at the interface between MHR1/2 and MHR3/4 domains (Fig. 1c).

103           The most remarkable difference between the apo and Ca<sup>2+</sup>-bound structures was at the  
104 ion-conducting pore (Fig. 1e, f, h). The intracellular half of the pore, which constitutes the  
105 channel gate, is restricted by I966 in the apo structure, giving a smallest radius of 0.8 Å (Fig. 1e,  
106 h); this represents an apo (resting) closed state (apo-TRPM5). By contrast, the Ca<sup>2+</sup>-bound  
107 structure has an enlarged pore with a smallest radius of 2.7 Å (Fig. 1f, h), which allows the  
108 passage of partially dehydrated monovalent cations, thus representing an agonist-bound active  
109 open state (Ca<sup>2+</sup>-TRPM5).

110           The extracellular half of the pore is confined by the pore loop, which shows little  
111 conformational change during channel gating and is generally considered to be responsible for  
112 ionic selectivity (Fig. 1e, f, h; Extended Data Fig. 8b). Here, we identified two ordered water  
113 molecules in each subunit (Extended Data Fig. 7c, e-f). Notably, the water molecules form a  
114 tight oxygen ring along with the backbone oxygen atoms of G905 (Fig. 1h), constituting the  
115 narrowest site in the pore loop region (Extended Data Fig. 7e, g). The radius is approximately 2.5  
116 Å, about the Na<sup>+</sup>-O distance in a six-coordinate hydrated sodium (2.4 Å)<sup>26</sup>. We suggest this  
117 oxygen ring acts as the selectivity filter, and the four water molecules provide a favorable  
118 hydration layer for sodium ions to permeate<sup>27</sup>. A similar selectivity filter likely also exists in  
119 TRPM4, given by the conserved sequences (Extended Data Fig. 10) and structures of their pore  
120 loop (Extended Data Fig. 8b). The replacement of Q977 (equivalent to Q906 in zebrafish  
121 TRPM5) by a glutamate gives human TRPM4 a moderate permeability to Ca<sup>2+</sup> (Ref<sup>28</sup>). A  
122 glutamate at this position may attract Ca<sup>2+</sup> ions by creating a binding site near the selectivity  
123 filter<sup>29</sup>. In addition, the glutamate might no longer form the same hydrogen bonding network,  
124 resulting in an altered conformation and size of the selectivity filter.

125 In the presence of NDNA and  $\text{Ca}^{2+}$  (NDNA/ $\text{Ca}^{2+}$ -TRPM5), we observe a well-defined  
126 density in each subunit wedging into a cleft between the S1-S4 domain and the pore domain of  
127 the TMD (Fig. 1d). This density unambiguously hews to the shape of a NDNA molecule  
128 (Extended Data Fig. 9a, b). Of note, this binding site has not been reported for any of the TRPM  
129 family channels, thus representing a novel site for modulating channel activity. Despite  $\text{Ca}^{2+}$   
130 binding to both  $\text{Ca}_{\text{TMD}}$  and  $\text{Ca}_{\text{ICD}}$ , the TMD of NDNA/ $\text{Ca}^{2+}$ -TRPM5 shows an apo-like  
131 conformation with a closed pore (Fig. 1d, g, h). We thus define it as an antagonist-bound  
132 inhibited state.

### 133 **Two calcium binding sites**

134 The  $\text{Ca}_{\text{TMD}}$  site is located within the S1-S4 domain and is surrounded by four amino acids  
135 and two water molecules in an octahedral geometry (Fig. 2a). The key residues coordinating the  
136  $\text{Ca}_{\text{TMD}}$  are absolutely conserved across the TRPM family members (Fig. 2c upper panel). Their  
137 replacement by an alanine largely abolished  $\text{Ca}^{2+}$ -invoked currents (Extended Data Fig. 1x-z),  
138 which indicates that binding of  $\text{Ca}^{2+}$  to  $\text{Ca}_{\text{TMD}}$  is indispensable for the activation of zebrafish  
139 TRPM5. The integrity of  $\text{Ca}_{\text{TMD}}$  site is also important for the activity of rat TRPM5 and other  
140  $\text{Ca}^{2+}$ -dependent TRPM channels<sup>30,31</sup>. We propose that the octahedral geometry of the  $\text{Ca}_{\text{TMD}}$  site  
141 is likely conserved among  $\text{Ca}^{2+}$ -sensitive TRPM channels, in light of the high sequence  
142 conservation of the  $\text{Ca}_{\text{TMD}}$  site and the similar spatial organization of the  $\text{Ca}^{2+}$ -coordinating  
143 residues (Fig. 2c; Extended Data Fig. 8c).

144 The newly defined  $\text{Ca}_{\text{ICD}}$  site is at the interface between the MHR1/2 and MHR3/4  
145 domains (Fig. 1c), in a negatively charged pocket. Part of the pocket is formed by a twisted  
146 helical segment,  $\alpha 12$ , of the MHR3 domain (Fig. 2b). The unique conformation of  $\alpha 12$  allows  
147 the side chains of D336 and E337 on one side of the twist, and backbone oxygen of D333 on the

148 other side, to face toward each other, thus creating a binding pocket to accommodate  $\text{Ca}^{2+}$  (Fig.  
149 2b).

150 To investigate the mechanism underlying  $\text{Ca}_{\text{ICD}}$  binding, we carried out structural  
151 comparisons and electrophysiological experiments. The overlay of  $\text{Ca}^{2+}$ -TRPM5 and apo-  
152 TRPM5 structures revealed that E337, C324, and the backbone oxygen of D333 form a rigid  
153 notch surrounding the binding site and show little movement upon  $\text{Ca}^{2+}$  binding; by contrast,  
154 D336 and E212 act as a flexible cap to enclose the  $\text{Ca}_{\text{ICD}}$  site (Fig. 2d). Specifically, E212 from  
155 MHR1/2 approaches the  $\text{Ca}_{\text{ICD}}$  site by moving approximately 3 Å, thus pulling the MHR1/2  
156 domain closer to the MHR3 domain (Fig. 2d); meanwhile, the side-chain of D336 flips  
157 approximately 90° toward the  $\text{Ca}^{2+}$  (Fig. 2d). We propose that E337, the only negatively charged  
158 residue in the rigid notch, plays a key role in the binding of  $\text{Ca}^{2+}$ . Indeed, replacement of E337  
159 with an alanine (E337A) rendered TRPM5 voltage-sensitive even at high  $\text{Ca}^{2+}$  concentration (up  
160 to 1000 μM), distinct from the wild-type TRPM5, which becomes nearly voltage-independent at  
161 high  $\text{Ca}^{2+}$  concentration (Figs. 1b, 2e; Extended Data Fig. 1c, m, u-w; Supplementary Fig. 3b).  
162 Mutations of other coordinating residues to alanine only moderately altered the voltage  
163 sensitivity (Extended Data Fig. 1d-g, n-q, u-w; Supplementary Fig. 3c-f).

164 The  $\text{Ca}_{\text{ICD}}$  site is unique for TRPM5 because the residues coordinating  $\text{Ca}_{\text{ICD}}$  are  
165 conserved among TRPM5 orthologues, but not in other TRPM channels, except for TRPM4 (Fig.  
166 2c lower panel). To understand why a site like the TRPM5  $\text{Ca}_{\text{ICD}}$  was not observed in the  
167 published TRPM4 structures<sup>20-23</sup> despite the conserved sequence, we compared their intracellular  
168 domains (ICDs) (Extended Data Fig. 10). We found that the key residues in TRPM4 are not  
169 close enough to each other to form a binding site because of two major structural differences.  
170 First, the structural element in TRPM4, which corresponds to the twisted helical segment  $\alpha 12$  in

171 TRPM5, is an intact  $\alpha$ -helix, so that E396 (equivalent to E337 in TRPM5) cannot face the  
172 backbone oxygen of A392 (equivalent to D333 in TRPM5) (Fig. 2f). Second, the interface of  
173 MHR1/2 and MHR3, where the  $\text{Ca}_{\text{ICD}}$  site is located, has a markedly different arrangement than  
174 in TRPM5, manifested by different angles between helices  $\alpha 11$  (on MHR1/2) and  $\alpha 12$  (on  
175 MHR3) (Fig. 2f).

### 176 **Antagonist binding site**

177 The antagonist NDNA is highly potent and inhibits  $\text{Ca}^{2+}$ -induced TRPM5 currents with  
178 an  $\text{IC}_{50}$  of approximately 2.4 nM (Fig. 3a–c). The molecular structure of NDNA consists of two  
179 rings, a naphthalen and a dimethoxybenzylidene, which are linked by an acetohydrazide group  
180 (Extended Data Fig. 9a). In the NDNA/ $\text{Ca}^{2+}$ -TRPM5 structure, the NDNA molecule is located at  
181 the interface between the S1-S4 domain and the pore domain (S5 and S6), near the  $\text{Ca}_{\text{TMD}}$  site  
182 (Fig. 3d). The two rings of NDNA are perpendicular to each other, forming a wedge shape. The  
183 naphthalen ring forms the base of the wedge, bracing on the S3 helix; the dimethoxybenzylidene  
184 ring forms the tip that penetrates through the cleft between S4 and S5, pressing against the pore  
185 domain of the adjacent subunit (Fig. 3d, e). The interaction between NDNA and TRPM5 is  
186 further enhanced by a hydrogen bond between the acetohydrazide linker and E853 on S5, and  
187 proximity of the same linker to W793 on S3 (Fig. 3f). Within the binding site, while most  
188 residues preserve their conformations in the apo state, the side chain of W869 flips to  
189 accommodate NDNA, forming a hydrogen bond with one of the methoxyl moieties on the  
190 dimethoxybenzylidene ring (Extended Data Fig. 9c; Fig. 3f).

191 In the NDNA/ $\text{Ca}^{2+}$ -TRPM5 structure, although both  $\text{Ca}_{\text{TMD}}$  and  $\text{Ca}_{\text{ICD}}$  sites are occupied  
192 by  $\text{Ca}^{2+}$ , we observed major differences relative to the  $\text{Ca}^{2+}$ -TRPM5 open state. First, the ICD  
193 showed the same trend of motion relative to the apo-TRPM5 structure but to a lesser extent

194 (Extended Data Fig. 9d). Second, the S1-S4 domain retained apo-like conformation and did not  
195 show marked conformational changes as observed in the  $\text{Ca}^{2+}$ -bound open state, resulting in a  
196 different coordination of  $\text{Ca}_{\text{TMD}}$ , with Q771 on the S2 helix not involved in the binding  
197 (Extended Data Fig. 9e, g). Lastly, the pore domain is closed, similar to the apo state (Extended  
198 Data Fig. 9h; Fig. 1g, h). Together, our data suggest that NDNA inhibits  $\text{Ca}^{2+}$ -induced TRPM5  
199 activation in a non-competitive manner. Despite  $\text{Ca}^{2+}$  binding, NDNA limits the movement of  
200 the S1-S4 domain and the pore domain, thus stabilizing the TMD in an apo-like closed state.

### 201 **The two roles of the $\text{Ca}_{\text{ICD}}$ site**

202 The alanine mutants of the key residues in the  $\text{Ca}_{\text{ICD}}$  site had the same  $\text{Ca}^{2+}$ -induced  
203 channel activation as the wild type, but they shifted the voltage dependence toward a positive  
204 membrane potential to different degrees, with E337A having the strongest phenotype (Fig. 2e;  
205 Extended Data Fig. 1m–q, u; Supplementary Fig. 1). E337A remained voltage-dependent  
206 regardless of  $\text{Ca}^{2+}$  concentration, which was in sharp contrast to the wild type, in which current  
207 changed from voltage-dependent at low  $\text{Ca}^{2+}$  concentration to nearly voltage-independent at high  
208  $\text{Ca}^{2+}$  concentration (Fig. 1b; Fig. 2e; Extended Data Fig. 1a, c, k, m, u–w; Supplementary Fig. 3a,  
209 b). We further looked into the same mutant on human TRPM5 (E351A) and observed the same  
210 phenotype (Extended Data Fig. 1h, i, r, s, u–w).

211 These results indicate that  $\text{Ca}_{\text{ICD}}$  modulates the voltage dependence of TRPM5. To  
212 ground our interpretations of the electrophysiological data, we determined the structure of  
213 E337A in the presence of 5 mM  $\text{Ca}^{2+}$  at 2.9 Å resolution (Fig. 4a; Extended Data Fig. 11). As  
214 expected, the ICD showed a wild type apo-like conformation and the  $\text{Ca}_{\text{ICD}}$  site was unoccupied  
215 (Fig. 4b, c). This supports the idea that replacement of E337 by an alanine indeed impaired  $\text{Ca}^{2+}$

216 binding to the  $\text{Ca}_{\text{ICD}}$  site and that the altered voltage dependence of E337A was caused by  
217 abolished  $\text{Ca}^{2+}$  binding to the  $\text{Ca}_{\text{ICD}}$  site.

218 Although our data analysis workflow involved a focused classification of the TMD  
219 (Extended Data Fig. 11a), part of the TMD is still not unambiguously defined, and the densities  
220 for  $\text{Ca}_{\text{TMD}}$  were markedly weaker than those in the structure of  $\text{Ca}^{2+}$ -bound wild-type TRPM5,  
221 indicating the structural heterogeneity of the TMD. We therefore performed structural analysis  
222 on a single subunit and obtained two conformations that had the same ICD but distinct S1-S4  
223 domains in the TMD (Fig. 4b-h). One had an empty  $\text{Ca}_{\text{TMD}}$ , termed apo-TRPM5(E337A) (Fig.  
224 4b, d), and the other had an occupied  $\text{Ca}_{\text{TMD}}$ , termed  $\text{Ca}^{2+}$ -TRPM5(E337A) (Fig. 4c, e). This  
225 suggests that an unoccupied  $\text{Ca}_{\text{ICD}}$  site lowers the binding affinity of  $\text{Ca}^{2+}$  for the  $\text{Ca}_{\text{TMD}}$  site. The  
226 cooperativity between these two  $\text{Ca}^{2+}$  binding sites agrees with the observation that upon  
227 activation with  $1 \mu\text{M } \text{Ca}^{2+}$ , the current amplitudes of the E337A mutant at a clamp of +200 mV  
228 were substantially smaller (75%) than those of the wild type (Extended Data Fig. 1a, c, k, m, v).

229 Within the TMD, a closed ion-conducting pore was observed in the  $\text{Ca}^{2+}$ -TRPM5(E337A)  
230 structure (Fig. 4i). This further supports the role of  $\text{Ca}_{\text{ICD}}$  as a voltage-modulating site, as its  
231 absence renders TRPM5(E337A) inactive due to the lack of membrane depolarization under the  
232 conditions for structural determination (Fig. 2e). Interestingly, the cytosolic vestibule, the part  
233 underneath the channel gate in  $\text{Ca}^{2+}$ -TRPM5(E337A), is similar to that of  $\text{Ca}^{2+}$ -TRPM5 (Fig. 4i),  
234 suggesting that the pore in  $\text{Ca}^{2+}$ -TRPM5(E337A) may represent an intermediate state prior to  
235 channel opening.

236 The cooperativity between  $\text{Ca}_{\text{TMD}}$  and  $\text{Ca}_{\text{ICD}}$  sites implies that  $\text{Ca}_{\text{ICD}}$  might be  
237 physiologically relevant. To test this hypothesis, we determined the structure of wild-type

238 TRPM5 in the presence of 6  $\mu\text{M}$   $\text{Ca}^{2+}$ , a concentration similar to the  $\text{Ca}^{2+}$   $\text{EC}_{50}$  of TRPM5  
239 channels excised from native taste receptor cells (8  $\mu\text{M}$  at  $-80$  mV)<sup>4</sup>. Interestingly, this condition  
240 yielded both the apo conformation and the  $\text{Ca}^{2+}$ -bound open conformation (Extended Data Fig.  
241 4e-h). The ratio of protein particles belonging to the apo and open conformations, respectively, is  
242 1.4:1. This data thus quantitatively correlates agonist-induced conformational changes to the  
243  $\text{EC}_{50}$  determined by excised patch recordings. Furthermore,  $\text{Ca}_{\text{TMD}}$  and  $\text{Ca}_{\text{ICD}}$  are clearly  
244 occupied in the open state, which indicates that  $\text{Ca}^{2+}$  at  $\text{EC}_{50}$  concentration binds equally well to  
245 both sites, thus supporting the physiological relevance of  $\text{Ca}_{\text{ICD}}$  (Extended Data Fig. 4i).

246 To understand why the occupation of the  $\text{Ca}_{\text{ICD}}$  site is required for a high-affinity  $\text{Ca}_{\text{TMD}}$   
247 site in TRPM5 but not in TRPM4, we compared the conformational changes in their  $\text{Ca}_{\text{TMD}}$  sites  
248 upon binding of  $\text{Ca}^{2+}$ . In TRPM5, the helices S2 and S3—containing the coordinating residues  
249 and the TRP helix, which are key elements in transducing signals from the ICD to TMD—  
250 undergo substantial movement (Fig. 4j). By contrast, in TRPM4, the  $\text{Ca}_{\text{TMD}}$  site and the TRP  
251 helix mostly showed only minor sidechain rearrangement (Fig. 4k). This difference suggests that  
252 the  $\text{Ca}_{\text{TMD}}$  site in TRPM4 may be primed for  $\text{Ca}^{2+}$  binding, whereas in TRPM5, a high-affinity  
253  $\text{Ca}_{\text{TMD}}$  site likely requires extensive rearrangement of the S2 and S3, assisted by  $\text{Ca}^{2+}$  binding to  
254 the  $\text{Ca}_{\text{ICD}}$  site.

255 Taken together, our data suggest the  $\text{Ca}_{\text{ICD}}$  site is physiologically relevant and has two  
256 important roles. First, it acts as a voltage modulator that shifts the voltage dependence toward  
257 negative potential, reminiscent of the effect of decavanadate and PIP2 on TRPM4<sup>18,32</sup>. Second, it  
258 promotes  $\text{Ca}^{2+}$  binding to the  $\text{Ca}_{\text{TMD}}$  site and facilitates channel activation.

259 **Signal transduction from  $\text{Ca}_{\text{ICD}}$  to the TMD**



260           The structural comparison of TRPM5 in the absence versus the presence of  $\text{Ca}^{2+}$  showed  
261 conformational rearrangement throughout the protein, with individual domains mostly showing  
262 rigid body movement (Fig. 5a). To understand the respective contributions of the two  $\text{Ca}^{2+}$   
263 binding sites and how they cooperatively open the channel, we traced the conformational  
264 changes from the ICD and the S1-S4 domain to the ion-conducting pore.

265           Clamped by two lobes, i.e., the MHR1/2 and MHR3/4 domains, the  $\text{Ca}_{\text{ICD}}$  site underwent  
266 an opening of  $5.8^\circ$  upon binding of  $\text{Ca}^{2+}$  (Fig. 5b). As a result, the rib helix, which penetrates  
267 into the interface between the MHR3/4 domain and the adjacent MHR1/2 domain, showed a  
268 clockwise rotation of  $9.4^\circ$  as viewed from the intracellular side (Fig. 5c). Meanwhile, just above  
269 the rib helix, four helices that form a square shape also rotated clockwise (Fig. 5d). Because  
270 these “square” helices mediate the contact between adjacent subunits, their rotation altered the  
271 intersubunit interface. Specifically, in the absence of  $\text{Ca}^{2+}$ , the N- and C-termini of adjacent  
272 square helices are in close contact (Fig. 5e). Upon binding of  $\text{Ca}^{2+}$ , this interface is disrupted as  
273 the adjacent termini rotate away from each other, resulting in a new interface between the N-  
274 terminus of the square helix and helix  $\alpha 28$ , where R552 and D610 form a salt bridge (Fig. 5f).  
275 Notably, the square helix in TRPM5 is broken into two short segments in the middle where E560  
276 interacts with the N-terminus of helix  $\alpha 27$  (Fig. 5e, f), a feature that is unique to TRPM5. By  
277 contrast, all the other TRPM channels have (or are predicted to have) a continuous square helix  
278 (Extended Data Fig. 8d, e).

279           We speculate that the square helix plays a role in the signal transduction from the  $\text{Ca}_{\text{ICD}}$   
280 site to the TMD because it links the remodeling of the intersubunit interface upon  $\text{Ca}^{2+}$  binding  
281 to the TRP helix—a key element involved in channel gating—through helices  $\alpha 27$  and  $\alpha 28$ .  
282 Indeed, replacement of E560 by an alanine, which presumably weakens the interaction between

283 the square helix and helix  $\alpha 27$ , led to slower channel activation and deactivation kinetics  
284 (Extended Data Fig. 1j, t). Moreover, the R578Q polymorphism in human TRPM5 (which  
285 corresponds to position 561 on the square helix in zebrafish TRPM5) has been associated with  
286 obesity-related metabolic syndrome<sup>33</sup>.

## 287 **Channel opening by synergistic action of $\text{Ca}_{\text{ICD}}$ and $\text{Ca}_{\text{TMD}}$**

288 Accompanying the conformational changes of the ICD induced by  $\text{Ca}^{2+}$  binding, the TRP  
289 helix is pushed toward the TMD where the  $\text{Ca}_{\text{TMD}}$  binding site is located (Fig. 6a). Here,  
290 surrounded by the TRP helix, S4-S5 linker, S2, and S3, is the region where the conformational  
291 changes induced by  $\text{Ca}^{2+}$  binding to the  $\text{Ca}_{\text{ICD}}$  and  $\text{Ca}_{\text{TMD}}$  sites meet, and where complex  
292 remodeling occurs (Fig. 6a, b). We performed a detailed structural analysis, and propose a  
293 mechanism by which the motion of the TRP helix promotes  $\text{Ca}^{2+}$  binding at the  $\text{Ca}_{\text{TMD}}$  site,  
294 ultimately leading to channel opening.

295 In the absence of  $\text{Ca}^{2+}$ , i.e., when the  $\text{Ca}_{\text{ICD}}$  site is unoccupied, the  $\text{Ca}_{\text{TMD}}$  site is in a  
296 configuration that is difficult to access by  $\text{Ca}^{2+}$  because two crucial residues, E768 and D797, are  
297 locked by R834 in a triangular hydrogen bond network (Fig. 6c). This conformation is stabilized  
298 by the interaction between helices S3 and S4, with W793 and H837 stacking with each other (Fig.  
299 6c). This explains why only a subset of particles from the  $\text{Ca}_{\text{ICD}}$  site-deficient mutant E337A  
300 showed an occupied  $\text{Ca}_{\text{TMD}}$  site even at high (5 mM)  $\text{Ca}^{2+}$  concentration (Extended Data Fig.  
301 11a).

302 When the  $\text{Ca}_{\text{ICD}}$  site is occupied, the TRP helix tilts toward the TMD, leading to three  
303 consequences. First, it pushes the S4 helix away from S2 and S3 (Fig. 6c), allowing E768 and  
304 D797 to be readily released from R834 to coordinate  $\text{Ca}^{2+}$  together with Q771, N794, and two

305 water molecules (Fig. 6d). Second, E994 on the TRP helix approaches the Ca<sub>TMD</sub> site to  
306 coordinate one of the two water molecules, thus helping the Ca<sub>TMD</sub> site bind Ca<sup>2+</sup> (Fig. 6d). Third,  
307 Y995 on the TRP helix accommodates the flipped H837 by forming a hydrogen bond, thereby  
308 assisting in the decoupling of S4 from S3 by breaking the  $\pi$ -stacking between H837 and W793  
309 (Fig. 6d). The decoupling of S4 from S3 is important, because it allows a relative movement  
310 between the S4-S5 linker and W984, a residue on the TRP helix that is absolutely conserved in  
311 the TRP superfamily and is crucial for channel gating<sup>34-36</sup>. As a result, the W984 switches its  
312 interaction partners from P847 and G846 on the N-terminus of S5 to the backbone oxygen of  
313 I841 on S4, forcing the last turn of the S4 helix and part of the S4-S5 linker to stretch into a 3<sub>10</sub>-  
314 helix (Fig. 6e, f). The movement of W984 breaks the major interaction between the TRP helix  
315 and S5, eventually enabling the pore domain (helices S5 and S6) to relocate. Indeed, the  
316 structural comparison between the apo and open states of TRPM5 showed a movement of the  
317 pore domain by half an  $\alpha$ -helical turn toward the extracellular side with an outward expansion,  
318 thus opening the ion-conducting pore (Fig. 6a, b).

## 319 **Conclusion and discussion**

320 Our TRPM5 structures define two Ca<sup>2+</sup> binding sites, Ca<sub>ICD</sub> and Ca<sub>TMD</sub>, which are 70 Å  
321 apart. Comparison of the structures in the apo and open states illustrates a molecular mechanism  
322 by which Ca<sup>2+</sup> binding to the two locations synergistically leads to a complex conformational  
323 rearrangement at the interface between the ICD and the TMD (Fig. 7). This rearrangement  
324 eventually gives rise to the decoupling between the TRP helix and the S5 helix and the opening  
325 of the ion-conducting pore. We conclude that Ca<sub>TMD</sub> functions as an orthosteric binding site for  
326 channel activation, while Ca<sub>ICD</sub> modulates the voltage dependence and the accessibility of Ca<sub>TMD</sub>.

327 The molecular basis by which the Ca<sub>ICD</sub> site modulates the voltage dependence is still unclear;  
328 that will require the identification of the voltage sensor(s) and its working mechanism.

329 We also defined a novel antagonist binding site in the TMD and elaborated a non-  
330 competitive inhibition mechanism by which the antagonist NDNA stabilizes the ion-conducting  
331 pore in an apo-like closed conformation (Fig. 7). Because NDNA is a potent TRPM5-selective  
332 antagonist and has potential implications in the treatment of diabetes, our work not only will  
333 facilitate the characterization of TRPM5 currents in many physiological processes, but is also  
334 important for the ongoing development of drugs targeting TRPM5.

335 TRPM4 and TRPM5 share substantial sequence similarity (55.7% between human  
336 TRPM4 and TRPM5, 58.1% between zebrafish TRPM4 and TRPM5), and both depolarize the  
337 cell membrane by sensing cytosolic Ca<sup>2+</sup>, but they are involved in different physiological  
338 processes. Interestingly, our data demonstrate that TRPM4 and TRPM5 are in fact structurally  
339 and functionally distinct. The unique Ca<sub>ICD</sub> site endows TRPM5 with a complex gating and  
340 modulation mechanism by Ca<sup>2+</sup>, which may link to the physiological roles of TRPM5 in taste  
341 signaling and in the Ca<sup>2+</sup> oscillation during insulin secretion by the pancreatic beta cells<sup>2,3</sup>. We  
342 have elaborated a Ca<sup>2+</sup>-induced gating mechanism of a voltage-sensitive TRPM channel, which  
343 differs from that of the voltage-insensitive TRPM2<sup>31,37-39</sup>. Our study highlights the important  
344 role of the ICD as a ligand-sensing domain in TRPM channels and lays a solid foundation for the  
345 development of novel therapeutic drugs that distinguish between TRPM4 and TRPM5.

#### 346 **Data availability**

347 The cryo-EM density map and coordinates of apo-TRPM5, Ca<sup>2+</sup>-TRPM5, NDNA/Ca<sup>2+</sup>-  
348 TRPM5, Ca<sup>2+</sup>-TRPM5(E337A) consensus, apo-TRPM5(E337A) single subunit and tetramer,

349  $\text{Ca}^{2+}$ -TRPM5(E337A) single subunit and tetramer, apo-TRPM5( $6\mu\text{M Ca}^{2+}$ ),  $\text{Ca}^{2+}$ -TRPM5( $6\mu\text{M}$   
350  $\text{Ca}^{2+}$ ), apo-TRPM5(nanodisc), and  $\text{Ca}^{2+}$ -TRPM5(nanodisc) were deposited in the EMDB  
351 (Electron Microscopy Data Bank) under accession numbers EMD-xxxx, EMD-xxxx, EMD-xxxx,  
352 EMD-xxxx, EMD-xxxx, EMD-xxxx, EMD-xxxx, and EMD-xxxx. Atomic models for apo-  
353 TRPM5,  $\text{Ca}^{2+}$ -TRPM5, NDNA/ $\text{Ca}^{2+}$ -TRPM5, apo-TRPM5(E337A) tetramer, and  $\text{Ca}^{2+}$ -  
354 TRPM5(E337A) tetramer were deposited in the Research Collaboratory for Structural  
355 Bioinformatics Protein Data Bank under accession codes xxxx, xxxx, xxxx, xxxx, and xxxx.

### 356 **Acknowledgements**

357 We thank G. Zhao and X. Meng for the support with data collection at the David Van  
358 Anzel Advanced Cryo-Electron Microscopy Suite. We appreciate the high-performance  
359 computing team of VAI for computational support. We thank D. Nadziejka and M. Martin for  
360 technical editing. W.L. is supported by National Institutes of Health (NIH) grants  
361 (R56HL144929, R01HL153219, and R01NS112363). J.D. is supported by a McKnight Scholar  
362 Award, a Klingenstein-Simon Scholar Award, a Sloan Research Fellowship in neuroscience, a  
363 Pew Scholar in the Biomedical Sciences award, and NIH grant (R01NS111031). Z.R. is  
364 supported by an American Heart Association postdoctoral fellowship (20POST35120556).

### 365 **Author Contributions**

366 W.L. and J.D. supervised the project. E.H., Z.R., and B.R. generated TRPM5 mutants.  
367 Z.R. and E.H. carried out the purification, cryo-EM data collection, and processing. I.O.  
368 performed electrophysiological experiments. Z.R., J.D., and W.L. analyzed the structures. M.S.  
369 and R.M. synthesized the compound NDNA. Z.R., E.H., I.O., M.S., R.M., J.D., and W.L.  
370 contributed to the manuscript preparation. The authors declare no conflicts of interest.

371 **Figure legends**

372 **Figure 1: The overall architecture.** **a**, Normalized  $\text{Ca}^{2+}$ -activated currents from patches  
373 excised from tsA201 cells overexpressing zebrafish WT TRPM5 and recorded in the inside-out  
374 patch-clamp configuration. Bath solutions containing free  $\text{Ca}^{2+}$  concentrations of 1, 30, 100, and  
375 1000  $\mu\text{M}$  were superfused and voltage clamps were imposed from +200 mV to -200 mV in steps  
376 of 20 mV with a final tail current pulse at -140mV. Background currents were subtracted by  
377 interleaved measurements with a calcium-free solution. Current amplitudes were measured at the  
378 end of the pulse (50 ms), normalized to +200 mV, and plotted as a function of clamp voltage (1  
379  $\mu\text{M}$   $\text{Ca}^{2+}$  [ $n = 13$  patches], 30  $\mu\text{M}$  [ $n = 6$ ], 100  $\mu\text{M}$  [ $n = 4$ ], 1000  $\mu\text{M}$  [ $n = 3$ ] from 12  
380 transfections). See Extended Data Fig. 1a for representative traces. Tail current analysis was also  
381 performed (see Supplementary Figure 1). **b, c**, The cryo-EM map (**b**) and the atomic model (**c**) of  
382  $\text{Ca}^{2+}$ -TRPM5 viewed parallel to the membrane. One subunit is highlighted in red. The  
383 unsharpened reconstruction is shown as transparent envelope in (**b**). The  $\text{Ca}^{2+}$  ions are shown as  
384 green spheres in (**c**). **d**, The atomic model of NDNA/ $\text{Ca}^{2+}$ -TRPM5 viewed parallel to the  
385 membrane. One subunit is highlight in cyan. The NDNA molecule is colored in orange. **e-g**, The  
386 profile of the ion-conducting pore in apo-TRPM5 (**e**),  $\text{Ca}^{2+}$ -TRPM5 (**f**), and NDNA/ $\text{Ca}^{2+}$ -  
387 TRPM5 (**g**) viewed parallel to the membrane. Purple, green, and red spheres define radii of >2.3,  
388 1.2-2.3, and <1.2 Å, respectively. The pore region (shown in cartoon), residues (shown in sticks)  
389 forming the gate, and the selectivity filter in two subunits are depicted. Lower right panel: the  
390 channel gate viewed from the intracellular side; the distance between the  $\text{Ca}$  atoms of adjacent  
391 I966 residues is labeled. Upper right box: a cartoon representing two subunits of the apo state.  
392 The unoccupied/occupied  $\text{Ca}^{2+}$  sites are shown as unfilled/filled circles, respectively. The cell  
393 membrane is shown as gray. **h**, Plot of pore radius along the pore axis.

394           **Figure 2: Ca<sup>2+</sup> binding sites. a, b**, The Ca<sub>TMD</sub> (**a**) and Ca<sub>ICD</sub> (**b**) sites. Ca<sup>2+</sup> is shown as a  
395 green sphere. The coordinating residues and water molecules are shown in sticks and spheres,  
396 respectively. Polar interactions are indicated by yellow bars. **c**, Sequence alignment of the Ca<sub>TMD</sub>  
397 (top) and Ca<sub>ICD</sub> site (bottom) among zebrafish TRPM5 (*drM5*), human TRPM5 (*hsM5*), human  
398 TRPM4 (*hsM4*), human TRPM2 (*hsM2*), and human TRPM8 (*hsM8*). The Ca<sup>2+</sup> coordinating  
399 residues in zebrafish TRPM5 are indicated by asterisks, and conserved coordinating residues are  
400 in red. The residue numbers are according to zebrafish TRPM5 (UniProtID: S5UH55). Sequence  
401 segments are separated by vertical bars. **d**, Remodeling of the Ca<sub>ICD</sub> site upon Ca<sup>2+</sup> binding.  
402 Apo-TRPM5 and Ca<sup>2+</sup>-TRPM5 are in blue and red, respectively. Black arrows indicate the  
403 movement of E212 and D336. The MHR1/2 domains in apo-TRPM5 and Ca<sup>2+</sup>-TRPM5 are  
404 represented by blue and red surfaces, respectively, showing the movement of MHR1/2. **e**,  
405 Normalized current amplitudes from excised tsA cells overexpressing E337A mutant channels  
406 measured in the inside-out configuration as performed in Fig. 1a. The number of patches are (1  
407 μM Ca<sup>2+</sup> [*n* = 7 patches], 30 μM [*n* = 7], 100 μM [*n* = 4], 1000 μM [*n* = 4] from 8 transfections).  
408 See Extended Data Fig. 1c for representative traces. **f**, The superimposition of Ca<sub>ICD</sub> site in  
409 TRPM5 (red) and TRPM4 (yellow, PDBID: 6BQR), by aligning the helix α11 and its equivalent  
410 in human TRPM4 (residues 396–403). The coordinating residues are shown as sticks. Equivalent  
411 structural elements and residues in TRPM4 are labeled with a prime symbol. The orientation of  
412 helix α12 and its equivalent (α12') in human TRPM4 (residues 372–386) are indicated by  
413 colored 3D arrows. The differences between α11 and α11', and between E337 and E396', are  
414 indicated by black arrows.

415           **Figure 3: Effect and binding site of antagonist NDNA. a and b**, Voltage-clamped (50  
416 ms steps from +200 mV to -200 mV) calcium activated whole-cell currents from tsA201 cells

417 over-expressing zebrafish WT TRPM5 were suppressed upon super-fusion of 10  $\mu$ M NDNA in  
418 the bath solution. **c**,  $IC_{50}$  of NDNA, 2.4 nM, was determined by measuring and plotting the  
419 remaining current following inhibition ( $I_{+200\text{ mV, NDNA}} / I_{+200\text{ mV, bath}}$ ) using various NDNA  
420 concentrations (1 fM, 10 pM, 100 pM, 1 nM, 100 nM, 0.5  $\mu$ M, 10  $\mu$ M). Concentration is plotted  
421 in log (M). Each point represents the mean current, and bars indicate SEM. The number of cells  
422 is indicated in brackets. From non-linear fitting, the Hill Slope is -0.5, and the 95% CI is 0.5 – 23  
423 nM. **d**, The pore domain of NDNA/ $Ca^{2+}$ -TRPM5 viewed from the extracellular side. The four  
424 bound NDNA molecule is shown in orange. Transmembrane helices surrounding a copy of  
425 NDNA is labeled. Prime symbol indicates the adjacent subunit.  $Ca_{TMD}$  is shown in green sphere.  
426 **e** and **f**, Two close-up views for the detailed interactions mediated by the NDNA. One TRPM5  
427 subunit is colored in cyan, whereas the adjacent subunit is colored in light cyan. Polar  
428 interactions between NDNA and residues are indicated by black lines.

429 **Figure 4: The structures of the  $Ca_{ICD}$ -deficient mutant E337A.** **a**, The upper panel  
430 shows the consensus map obtained from the  $Ca^{2+}$ -TRPM5(E337A) data. One subunit is  
431 highlighted. The cartoons in the lower panel represent the two conformations that have distinct  
432 occupancies at the  $Ca_{TMD}$  site, obtained by single subunit analysis of the same data: apo-  
433 TRPM5(E337A) in magenta and  $Ca^{2+}$ -TRPM5(E337A) in cyan. The unoccupied  $Ca^{2+}$  sites are  
434 shown as unfilled circles; occupied  $Ca^{2+}$  sites are shown as green circles. The cell membrane is  
435 represented in gray. **b-e**, the  $Ca_{ICD}$  site (**b**) and  $Ca_{TMD}$  site (**d**) in apo-TRPM5(E337A), and the  
436  $Ca_{ICD}$  site (**c**), and  $Ca_{TMD}$  site (**e**) in  $Ca^{2+}$ -TRPM5(E337A). The cryo-EM densities are shown in  
437 black mesh. The  $Ca^{2+}$  density is shown as a green sphere. Unoccupied sites are indicated by a  
438 dashed gray circle. **f**, The superimpositions of the S1-S4 domain of the apo-TRPM5(E337A)  
439 (magenta) and the  $Ca^{2+}$ -TRPM5(E337A) (cyan) structures. **g**, The superimpositions of the S1-S4



440 domain of the apo-TRPM5(E337A) (magenta) and the apo-TRPM5 (blue) structures. **h**, The  
441 superimpositions of the S1-S4 domain of the  $\text{Ca}^{2+}$ -TRPM5(E337A) (cyan) and the  $\text{Ca}^{2+}$ -TRPM5  
442 (red) structures. **i**, Plot of pore radius along the pore axis. **j**, **k**, Remodeling of the  $\text{Ca}_{\text{ICD}}$  site upon  
443  $\text{Ca}^{2+}$  binding in TRPM5 (**j**) and TRPM4 (**k**). Apo-TRPM5 and  $\text{Ca}^{2+}$ -TRPM5 are in blue and red,  
444 respectively (**j**). Apo-TRPM4 (PDBID: 6BQR) and  $\text{Ca}^{2+}$ -TRPM4 (PDBID: 6BQV) are in gray  
445 and yellow, respectively (**k**). The  $\text{C}\alpha$  atoms of key residues and the  $\text{Ca}^{2+}$  are shown as spheres.  
446 Shown in parentheses are the distances of the root-mean-square-deviation (RMSD) between S2  
447 (residues 767–772 in TRPM5 and 827–832 in TRPM4) and S3 (residues 793–798 in TRPM5 and  
448 864–869 in TRPM4), and the distances of the  $\text{C}\alpha$  movements of E994 in TRPM5 and E1068 in  
449 TRPM4.

450 **Figure 5: The signal transduction from ICD to TMD.** **a**, The superimposition of apo-  
451 TRPM5 (blue) and  $\text{Ca}^{2+}$ -TRPM5 (red) structures by aligning the coiled-coil poles in the C-  
452 terminal domain (CTD), viewed parallel to the membrane. The protein is shown in surface  
453 representation and one subunit is also shown in cartoon representation.  $\text{Ca}^{2+}$  is shown as green  
454 spheres. **b**, The superimposition of the MHR1-4 domains of apo-TRPM5 (blue) and  $\text{Ca}^{2+}$ -  
455 TRPM5 (red) by aligning the MHR3/4 domain, viewed parallel to the membrane. The rotation of  
456 the MHR1/2 relative to the MHR3/4 domain upon  $\text{Ca}^{2+}$  binding is indicated. The surfaces are  
457 outlined in blue for apo-TRPM5 and filled with red for  $\text{Ca}^{2+}$ -TRPM5. **c**, Superimposition of the  
458 MHR3/4 domain and the CTD rib and pole helices of apo-TRPM5 (blue) and  $\text{Ca}^{2+}$ -TRPM5 (red)  
459 by aligning the CTD coiled-coil poles, viewed from the intracellular side. The surfaces of one  
460 subunit in both structures are shown in blue (apo-TRPM5) or in red ( $\text{Ca}^{2+}$ -TRPM5). The  
461 rotation of the rib helices is indicated. **d**, The superimposition of the ICD-TMD interface of apo-  
462 TRPM5 (blue) and  $\text{Ca}^{2+}$ -TRPM5 (red) by aligning the CTD coiled-coil poles (not shown),

463 viewed from the intracellular side. The rotations of helices square<sub>N</sub> and square<sub>C</sub> are indicated.  
464 The green circle highlights the location of the intersubunit interface and ICD–TMD interface, as  
465 detailed in panels (e, f). e, f, The conformational rearrangement at the intersubunit interface and  
466 the ICD–TMD interface from apo–TRPM5 (e) to Ca<sup>2+</sup>–TRPM5 (f), viewed parallel to the  
467 membrane. Two adjacent subunits are shown in bright and light colors, respectively. Structural  
468 elements and residues of one subunit are labeled with a prime symbol. Interactions are shown in  
469 yellow bars. The single headed arrows indicate the movement of the square and TRP helices.  
470 The double headed arrow indicates the angle between S6 and TRP. The positions of the  
471 intersubunit interface are shown by green circles.

472 **Figure 6: The channel opening.** a, The superimposition of the TMD of a single subunit  
473 in apo–TRPM5 (blue) and Ca<sup>2+</sup>–TRPM5 (red) by aligning their S1-S4 domain, viewed parallel to  
474 the membrane. The center-of-mass movement of the pore domain is indicated. b, The  
475 superimposition of the pore domain in apo–TRPM5 (blue) and Ca<sup>2+</sup>–TRPM5 (red) by aligning  
476 their S1-S4 domain, viewed from the intracellular side. The pore domain of Ca<sup>2+</sup>–TRPM5 is  
477 shown in surface representation and the S5-S6 domain of one subunit from each structure is  
478 shown as a cartoon. The relative movements of helices S5 and S6 are indicated. c, d, Close-ups  
479 of the circled area in (a), viewed from the intracellular side. The remodeling of the Ca<sub>TMD</sub> site  
480 from apo–TRPM5 (c) to Ca<sup>2+</sup>–TRPM5 (d). The movements of S2, S3, S4, and TRP helices are  
481 indicated by arrows. Interactions are shown in yellow bars. e, f, Close-ups of the boxed area in  
482 (a). W984 on the TRP helix switches its interaction partner from P847 and G846 in apo–TRPM5  
483 (e) to I841 in Ca<sup>2+</sup>–TRPM5 (f). Interactions are shown in yellow bars. The movement of W984 is  
484 indicated. The contact area between the TRP helix and the S4-S5 linker is highlighted in grey.

485 The segment between I836 and I841 turns into a  $3_{10}$ -helix in  $\text{Ca}^{2+}$ -TRPM5. The inset shows the  
486 view along the axis of the S4 helix.

487 **Figure 7: Schematic of the activation and inhibition mechanism of TRPM5.**

488 Conformational changes initialized from both  $\text{Ca}^{2+}$  sites cooperatively open the ion-conducting  
489 pore. The antagonist NDNA wedges into the space between the S1-S4 domain and pore domain,  
490 stabilizing the TMD in an apo-like closed state. The movements of individual structural elements  
491 are indicated by arrows.

492 **Extended Data Figure legends**

493 **Extended Data Figure 1: Patch-clamp analysis of TRPM5 and TRPM4 channels.**

494 Representative current traces of inside-out patch-clamp measurements from tsA201 cells  
495 overexpressing human TRPM4 (*hs*TRPM4), human TRPM5 (*hs*TRPM5), and zebrafish TRPM5  
496 (*dr*TRPM5) channels. Patches were stimulated with either 1, 30, 100, or 1000  $\mu\text{M}$   $\text{Ca}^{2+}$  and were  
497 voltage-clamped from +200 mV to -200 mV. See Methods for detailed description. The number  
498 of patches and transfections were **a**, *dr*TRPM5(WT) 1  $\mu\text{M}$   $\text{Ca}^{2+}$  [ $n = 13$  patches], 30  $\mu\text{M}$  [6], 100  
499  $\mu\text{M}$  [4], 1000  $\mu\text{M}$  [3] from 12 transfections; **b**, *hs*TRPM4(WT): 1  $\mu\text{M}$   $\text{Ca}^{2+}$  [4], 100  $\mu\text{M}$  [4],  
500 1000  $\mu\text{M}$  [4] from 3 transfections; **c**, *dr*TRPM5(E337A): 1  $\mu\text{M}$   $\text{Ca}^{2+}$  [6], 30  $\mu\text{M}$  [6], 100  $\mu\text{M}$  [4],  
501 1000  $\mu\text{M}$  [4] from 8 transfections; **d**, *dr*TRPM5(C324A): 1  $\mu\text{M}$   $\text{Ca}^{2+}$  [6], 30  $\mu\text{M}$  [6], 100  $\mu\text{M}$  [6],  
502 1000  $\mu\text{M}$  [6] from 4 transfections; **e**, *dr*TRPM5(D333A): 1  $\mu\text{M}$   $\text{Ca}^{2+}$  [5], 30  $\mu\text{M}$  [4], 100  $\mu\text{M}$  [5],  
503 1000  $\mu\text{M}$  [3] from 3 transfections; **f**, *dr*TRPM5(E212A): 1  $\mu\text{M}$   $\text{Ca}^{2+}$  [4], 30  $\mu\text{M}$  [3], 100  $\mu\text{M}$  [4],  
504 1000  $\mu\text{M}$  [3] from 3 transfections; **g**, *dr*TRPM5(D336A): 1  $\mu\text{M}$   $\text{Ca}^{2+}$  [3], 30  $\mu\text{M}$  [3], 100  $\mu\text{M}$  [3],  
505 1000  $\mu\text{M}$  [3] from 2 transfections; **h**, *hs*TRPM5(WT): 1  $\mu\text{M}$   $\text{Ca}^{2+}$  [5], 30  $\mu\text{M}$  [5] from 3  
506 transfections; **i**, *hs*TRPM5(E351A): 1  $\mu\text{M}$   $\text{Ca}^{2+}$  [3], 30  $\mu\text{M}$  [3] from 1 transfection; and **j**,

507 *hs*TRPM5(E560A): 1  $\mu\text{M}$   $\text{Ca}^{2+}$  [5], 30  $\mu\text{M}$  [3], 100  $\mu\text{M}$  [3], 1000  $\mu\text{M}$  [3] from 5 transfections.  
508 Currents measured in the absence of calcium were subtracted from currents measured in the  
509 presence of various calcium concentrations. **k–t**, Mean current amplitudes (50 ms) of  
510 experiments (**a–j**) were plotted as a function of clamp voltage. The +200 mV clamp was chosen  
511 for normalization. Horizontal bars represent SEM. In some cases the symbol size is larger than  
512 the error bars. The normalized current-voltage relation plots of *dr*TRPM5(WT) and  
513 *dr*TRPM5(E337A) are identical to those presented in Fig. 1a and Fig. 2e, respectively. **u–w**,  
514 Individual patch clamp measurements  $I_{-200\text{mV}} / I_{+200\text{mV}}$ ,  $I_{+200\text{mV}}$ ,  $I_{-200\text{mV}}$ , of experiments (**a–j**) are  
515 shown as individual points, where bars represent mean values. **x**, Representative whole-cell  
516 current traces of tsA overexpressing WT and  $\text{Ca}_{\text{TMD}}$  mutant *dr*TRPM5 channels. Clamps were  
517 imposed from +200 mV to –200 mV. The number of cells measured were tsA201 [ $n = 4$  cells],  
518 *dr*TRPM5(WT) [5], *dr*TRPM5(E768A) [5], *dr*TRPM5(Q771A) [4], *dr*TRPM5(N794A) [4],  
519 *dr*TRPM5(D797A) [4], and *dr*TRPM5(E994A) [4] from 2–3 transfections. **y**, Mean current  
520 amplitudes of experiments in (**x**) were measured at 50 ms and plotted as a function of clamp  
521 voltage. Horizontal bars represent SEM. **z**, Individual measurements at clamps of +200 mV  
522 ( $I_{+200\text{mV}}$ ) and -200 mV ( $I_{-200\text{mV}}$ ) of experiments in (**x**) are shown as individual points, with bars  
523 representing mean values.

524 **Extended Data Figure 2: TRPM5 detergent screening, purification, and expression**  
525 **test of calcium-binding-site mutants. a**, Fluorescence size-exclusion chromatography (FSEC)  
526 analysis of GFP-tagged zebrafish TRPM5 (*dr*TRPM5). The whole-cell sample was solubilized  
527 using GDN detergent and injected into a Superdex 6 Increase 5/150 GL column for high-  
528 performance liquid chromatography (HPLC) analysis. GFP fluorescence signal was probed  
529 across the retention volume. **b**, The size-exclusion chromatography profile of purified *dr*TRPM5

530 in GDN using Superdex 6 Increase 10/300 GL column. **c**, The SDS gel of purified *dr*TRPM5  
531 protein. The uncropped raw gel image is provided in Supplementary Fig. 1. **d**, The size-exclusion  
532 chromatography profile of *dr*TRPM5 reconstituted into lipid nanodiscs. **e** and **f**, The FSEC  
533 profiles of the *dr*TRPM5 Ca<sub>TMD</sub> and Ca<sub>ICD</sub> site mutants, respectively. The expected retention  
534 volume for the *dr*TRPM5 protein is indicated.

535 **Extended Data Figure 3: Apo-TRPM5 in GDN detergent.** **a**, The data processing  
536 workflow for apo-TRPM5 dataset. **b**, The representative 2D class average of apo-TRPM5. **c**,  
537 The Fourier shell correlation (FSC) curves for the apo-TRPM5. The cryo-EM map FSC is  
538 shown in black and the model vs. map cross-correlation is shown in red. The map resolution was  
539 determined by the gold-standard FSC at 0.143 criterion, whereas the model vs. map resolution  
540 was determined by a correlation threshold of 0.5. **d**, The angular distribution of particles that  
541 gave rise to the apo-TRPM5 cryo-EM map reconstruction. **e**, A schematic domain organization  
542 of a single TRPM5 subunit. Secondary structures and important domains are labeled. **f**, The  
543 atomic model of a single TRPM5 subunit in cartoon representation. The domains are colored as  
544 in (**e**). The left and right panels are two different views of the same subunit rotated 180° along  
545 the central axis.

546 **Extended Data Figure 4: Ca<sup>2+</sup>-TRPM5 in GDN detergent.** **a** and **e**, The data  
547 processing workflow for TRPM5 with 5mM Ca<sup>2+</sup> dataset (**a**) and TRPM5 with 6 μM Ca<sup>2+</sup>  
548 dataset (**e**). For the 5mM Ca<sup>2+</sup> dataset, we obtained two conformations with ordered TMD after  
549 focused classification. While the Ca<sub>TMD</sub> and Ca<sub>ICD</sub> are fully occupied in both classes, there is  
550 subtle differences in the TMD. We focus on the conformation with the highest nominal  
551 resolution for model building and the discussion in the manuscript. **b** and **f**, The representative

552 2D class average the 5mM Ca<sup>2+</sup> dataset (**b**) and 6 μM Ca<sup>2+</sup> dataset (**f**), respectively. **c** and **g**, The  
553 Fourier shell correlation (FSC) curves for the 5mM Ca<sup>2+</sup> dataset (**c**) and 6 μM Ca<sup>2+</sup> dataset (**g**).  
554 The cryo-EM map FSC is shown in black and the model vs. map cross-correlation is shown in  
555 red. The map resolution is determined by the gold-standard FSC at 0.143 criterion, whereas the  
556 model vs. map resolution is determined by a correlation threshold of 0.5. **d** and **h**, The angular  
557 distribution of particles that give rise to the cryo-EM map reconstruction for 5mM Ca<sup>2+</sup> dataset  
558 (**d**) and 6 μM Ca<sup>2+</sup> dataset (**h**). **i**, Close up view of the Ca<sub>TMD</sub> and Ca<sub>ICD</sub> of the 6 μM Ca<sup>2+</sup> dataset.  
559 From left to right, Ca<sub>TMD</sub> of apo-TRPM5(6 μM Ca<sup>2+</sup>), Ca<sub>TMD</sub> of Ca<sup>2+</sup>-TRPM5(6 μM Ca<sup>2+</sup>),  
560 Ca<sub>ICD</sub> of apo-TRPM5(6 μM Ca<sup>2+</sup>), and Ca<sub>ICD</sub> of Ca<sup>2+</sup>-TRPM5(6 μM Ca<sup>2+</sup>). The cryo-EM  
561 densities are shown in mesh representation. The expected Ca<sup>2+</sup> density is indicated by a circle.

562 **Extended Data Figure 5: NDNA/Ca<sup>2+</sup>-TRPM5 in GDN detergent.** **a**, The data  
563 processing workflow for NDNA/Ca<sup>2+</sup>-TRPM5 dataset. After TMD-focused classification and  
564 refinement, we found that the intracellular domain still contains major heterogeneity. To  
565 facilitate model building, we analyzed the intracellular domain at the single subunit level through  
566 3D classification. A set of single subunit particles with homogeneous ICD were converted back  
567 to the tetrameric TRPM5 particles and further refined to 2.97 Å resolution. Although the final  
568 map is of slightly worse nominal resolution (2.97 Å vs 2.83 Å), it facilitates the model building  
569 in the ICD. **b**, The Fourier shell correlation (FSC) curves for the NDNA/Ca<sup>2+</sup>-TRPM5. The  
570 cryo-EM map FSC is shown in black and the model vs. map cross-correlation is shown in red.  
571 The map resolution was determined by the gold-standard FSC at 0.143 criterion, whereas the  
572 model vs. map resolution was determined by a correlation threshold of 0.5. **d**, The angular  
573 distribution of particles that gave rise to the NDNA/Ca<sup>2+</sup>-TRPM5 cryo-EM map reconstruction.

574 **Extended Data Figure 6: Local resolution estimation of TRPM5 structures and**  
575 **representative densities. a-d**, The local resolution estimation for apo-TRPM5(GDN) (**a**), Ca<sup>2+</sup>-  
576 TRPM5(GDN) (**b**), Ca<sup>2+</sup>-TRPM5(E337A)(GDN) consensus (**c**), NDNA/Ca<sup>2+</sup>-TRPM5(GDN)  
577 (**d**). For each map, a side view, a top-down view of the TMD from the extracellular side, and a  
578 focused side view of the S6 and pore helix are shown. The color bar unit is in Ångstroms. **e**,  
579 Representative densities from Ca<sup>2+</sup>-TRPM5(GDN) map. For the GDN density, one maltose  
580 group of the molecule is not resolved in the cryo-EM density map.

581 **Extended Data Figure 7: The gate and the selectivity filter of TRPM5. a**, Cryo-EM  
582 densities of the Ca<sub>ICD</sub> site, contoured at 0.018. **b**, Cryo-EM densities of the Ca<sub>TMD</sub> site, contoured  
583 at 0.022. **c**, Cryo-EM densities of the water molecule and residues in the selectivity filter,  
584 contoured at 0.023. Hydrogen bonds are shown as solid yellow lines. The “lower” water  
585 molecule is surrounded by the sidechain of Q906 and the backbone oxygen atoms of F904 and  
586 G905, forming three hydrogen bonds. **d**, Cryo-EM densities of I966, which forms the channel  
587 gate, contoured at 0.03. **e**, The selectivity filter formed by two layers of ordered water molecules  
588 (blue spheres) and backbone oxygen atoms (pink spheres) of G905. **f** and **g**, The two hydration  
589 layers the selectivity filter viewed from the extracellular side. Upper layer in (**f**) and lower layer  
590 in (**g**).

591 **Extended Data Figure 8: Comparison of TRPM5 with other TRPM channels. a**, A  
592 structural comparison between Ca<sup>2+</sup>-TRPM5 and TRPM4 (PDBID: 6BQV). A single subunit is  
593 in color and shown as a cartoon. The TRPM5 channel is more compact, but wider than, the  
594 TRPM4 channel. **b**, An overlap of the selectivity filter of Ca<sup>2+</sup>-TRPM5 (red) and TRPM4  
595 (yellow). **c**, A comparison of the Ca<sub>TMD</sub> site for the available TRPM members. From left to right,  
596 *dr*TRPM5, *hs*TRPM4 (6BQV), *dr*TRPM2 (6DRJ), *nv*TRPM2 (6CO7), *hs*TRPM2 (6PUS), and

597 *pm*TRPM8 (6O77)<sup>23,24,31,37,38</sup>; Shown in parentheses are the PDBIDs. **d**, Comparison of the  
598 “square” helices in TRPM2 (6PUO), TRPM4 (6BQR), TRPM5, TRPM7 (5ZX5), TRPM8  
599 (6O6A); Shown in parentheses are the PDBIDs. Only TRPM5 has a broken square helix. **e**, A  
600 sequence alignment of the square helix across different TRPM5 orthologs and TRPM family  
601 members. Red indicates that the  $\alpha$ -helix is observed in structures. For TRPM1, TRPM3, and  
602 TRPM6, in which no structures are currently available, the helical annotation is based on the  
603 secondary structure prediction from PSIPRED server<sup>40</sup>.

604 **Extended Data Figure 9: Comparison of NDNA/Ca<sup>2+</sup>-TRPM5 with apo-TRPM5**  
605 **and Ca<sup>2+</sup>-TRPM5. a**, the chemical structure of N'-(3,4-dimethoxybenzylidene)-2-(naphthalen-  
606 1-yl)acetohydrazide (NDNA). **b**, Two close-up views of the cryo-EM densities of NDNA  
607 molecule. The surrounding protein structural element is shown in cartoon representation. **c**,  
608 Comparison of the NDNA binding site between NDNA/Ca<sup>2+</sup>-TRPM5 and apo-TRPM5  
609 structures. The W869 is flipped in the NDNA/Ca<sup>2+</sup>-TRPM5 structure (cyan) compared to that in  
610 apo-TRPM5 structure (blue). **d**, Overlay of NDNA/Ca<sup>2+</sup>-TRPM5 (cyan) with apo-TRPM5 (blue)  
611 and Ca<sup>2+</sup>-TRPM5 (red) structures view from the intracellular side. One subunit is shown in  
612 cartoon representation and the other three subunits are in surface representation. The ICD of  
613 NDNA/Ca<sup>2+</sup>-TRPM5 adopts an intermediate state compared to the apo-TRPM5 and Ca<sup>2+</sup>-  
614 TRPM5 structures. **e**, The superimposition of the S1-S4 domain between NDNA/Ca<sup>2+</sup>-TRPM5  
615 (cyan) and apo-TRPM5 (blue). **f**, The superimposition of the S1-S4 domain between  
616 NDNA/Ca<sup>2+</sup>-TRPM5 (cyan) and Ca<sup>2+</sup>-TRPM5 (red). **g**, A close-up view of the Ca<sub>TMD</sub> site in  
617 NDNA/Ca<sup>2+</sup>-TRPM5 structure. The Q771 moved away from Ca<sub>TMD</sub>. **h** and **i**, An overlay of the  
618 pore domain between NDNA/Ca<sup>2+</sup>-TRPM5 (cyan) with apo-TRPM5 (blue) (**h**) and Ca<sup>2+</sup>-  
619 TRPM5 (red) (**i**) structures viewed from the extracellular side.



620 **Extended Data Figure 10: A sequence alignment of TRPM5 orthologs and**  
621 ***hs*TRPM4.** Secondary structure elements are indicated at the top. Residues forming the Ca<sub>TMD</sub>  
622 and Ca<sub>ICD</sub> sites are indicated by blue and red dots, respectively. The selectivity filter is  
623 highlighted with a red frame. The NDNA interacting residues are marked with a magenta star.

624 **Extended Data Figure 11: Ca<sup>2+</sup>-TRPM5(E337A) in GDN detergent.** **a**, The data  
625 processing workflow for Ca<sup>2+</sup>-TRPM5(E337A) dataset. **b**, The representative 2D class average  
626 of Ca<sup>2+</sup>-TRPM5(E337A). **c**, The FSC curve for the consensus map of Ca<sup>2+</sup>-TRPM5(E337A).  
627 The map resolution was determined by the gold-standard FSC at 0.143 criterion. **d**, The angular  
628 distribution of particles that give rise to the consensus map of Ca<sup>2+</sup>-TRPM5(E337A). **e**, The FSC  
629 curve for apo-TRPM5(E337A) (left) and Ca<sup>2+</sup>-TRPM5(E337A) (right). For each panel, the  
630 cryo-EM map FSC curve is shown in black and the model vs. map correlation is shown in  
631 red. The map resolution was determined by the gold-standard FSC at 0.143 criterion, whereas the  
632 model vs. map resolution was determined by a correlation threshold of 0.5.

633 **Extended Data Table 1: Cryo-EM data collection, refinement, and validation**  
634 **statistics.**

635 **Supplementary Figure 1: Tail current analysis of TRPM5 current.** **a-e**, Tail currents  
636 (for inside-out patch clamp experiments performed in Fig 1-2, Extended Data Figure 1) were  
637 plotted as a function of clamp voltage for *dr*TRPM5(WT), *dr*TRPM5(E337A),  
638 *dr*TRPM5(C324A), *dr*TRPM5(D333A), *dr*TRPM5(E212A) and *dr*TRPM5(D336A). Tail current  
639 amplitudes were measured at a clamp of -140 mV following activation voltages from -200 mV to  
640 +200 mV. For normalization (bottom row), a clamp of +200 mV was chosen. The number of  
641 cells used for analysis were: *dr*TRPM5(WT): 1 μM Ca<sup>2+</sup> [11], 30 μM [5], 100 μM [3], 1000 μM

642 [3], *dr*TRPM5(E337A): 1  $\mu\text{M}$   $\text{Ca}^{2+}$  [3], 30  $\mu\text{M}$  [3], 100  $\mu\text{M}$  [5], 1000  $\mu\text{M}$  [4],  
643 *dr*TRPM5(C324A): 1  $\mu\text{M}$   $\text{Ca}^{2+}$  [5], 30  $\mu\text{M}$  [5], 100  $\mu\text{M}$  [5], 1000  $\mu\text{M}$  [4], *dr*TRPM5(D333A): 1  
644  $\mu\text{M}$   $\text{Ca}^{2+}$  [5], 30  $\mu\text{M}$  [4], 100  $\mu\text{M}$  [4], 1000  $\mu\text{M}$  [3], *dr*TRPM5(E212A): 1  $\mu\text{M}$   $\text{Ca}^{2+}$  [4], 30  $\mu\text{M}$   
645 [3], 100  $\mu\text{M}$  [4], 1000  $\mu\text{M}$  [2] and *dr*TRPM5(D336A): 1  $\mu\text{M}$   $\text{Ca}^{2+}$  [3], 30  $\mu\text{M}$  [3], 100  $\mu\text{M}$  [3],  
646 1000  $\mu\text{M}$  [3].

647

648 **Supplementary Figure 2: Apo-TRPM5 and  $\text{Ca}^{2+}$ -TRPM5 in nanodiscs.** **a** and **b**, The  
649 data processing workflow for apo-TRPM5(nanodisc) and  $\text{Ca}^{2+}$ -TRPM5(nanodisc), respectively.  
650 **c** and **d**, the representative 2D class averages of apo-TRPM5(nanodisc) and  $\text{Ca}^{2+}$ -  
651 TRPM5(nanodisc), respectively. **e**, The FSC curves for the apo-TRPM5(nanodisc) (black) and  
652  $\text{Ca}^{2+}$ -TRPM5(nanodisc) (red). The map resolution was determined by the gold-standard FSC at  
653 0.143 criterion. **f**, The angular distribution of apo-TRPM5(nanodisc) and  $\text{Ca}^{2+}$ -TRPM5(nanodisc)  
654 particles that give rise to the cryo-EM map reconstructions. **g**, The local map correlations  
655 between apo-TRPM5(nanodisc) vs. apo-TRPM5(GDN) and between  $\text{Ca}^{2+}$ -TRPM5(nanodisc)  
656 vs.  $\text{Ca}^{2+}$ -TRPM5(GDN). The color bar represents the correlation coefficient.

657 **Supplementary Figure 3: The raw gel images.** The raw SDS gel image to produce  
658 Extended Data Fig. 2c.

659 **Supplementary Figure 4: Synthesis of NDNA.** **a**, NDNA is synthesized by a two-step  
660 chemical reaction. **b**, The 400mHz  $^1\text{H}$  NMR spectrum of the intermediate compound 2 (upper  
661 panel) and NDNA (lower panel).

662

## 663 **Methods**

### 664 **TRPM5 expression and purification**

665 Genes encoding full-length human and zebrafish TRPM5 (UniProtKB accession numbers  
666 Q9NZQ8, and S5UH5, respectively) were synthesized by Bio Basic and were sub-cloned into a  
667 pEG BacMam vector with an His8 tag, GFP, and a thrombin cleavage site at the N terminus<sup>41</sup>.  
668 Site-directed mutagenesis is performed by using QuikChange II Site-directed mutagenesis  
669 (Qiagen) or Q5 Site-Directed Mutagenesis (NEB) protocol, and confirmed via Sanger  
670 sequencing (Eurofins). For baculovirus production, each TRPM5 ortholog in a BacMam vector is  
671 transformed into DH10Bac cells, followed by P1 and P2 baculovirus generated in Sf9 cells. P2  
672 viruses (8%) were used to infect tsA201 cells grown in Freestyle 293 Expression Medium in  
673 suspension culture (ThermoFisher). Infected cells were incubated for an initial 12 h at 37 °C  
674 before 10 mM sodium butyrate was added. Cells were then moved to a 30 °C incubator and  
675 allowed to grow for another 60 h with vigorous shaking. At 72 h post-infection, cells were  
676 harvested by centrifugation at 5000 rpm, 4 °C for 30 min. Cell pellets were washed with buffer  
677 containing 150 mM NaCl and 20 mM Tris pH 8.0 (TBS buffer) and stored at –80 °C.

678

679 Cell pellets from 200 ml culture were thawed on ice and resuspended in TBS buffer containing 1  
680 mM PMSF, 0.8 µM aprotinin, 2 µg mL<sup>-1</sup> leupeptin, 2 mM pepstatin A (which are all protease  
681 inhibitors) plus 1% GDN detergent (Anatrace). Protein was extracted from the membrane by  
682 whole-cell solubilization for 1 h at 4 °C with rotation. The solubilized protein was incubated  
683 with 2 mL TALON cobalt metal-affinity resin (Takara Bio) for 1 h. The TALON resin was then  
684 washed with 20 ml TBS buffer supplemented with 0.02% GDN and 15 mM imidazole. Protein  
685 was eluted with TBS buffer supplemented with 0.02% GDN and 250 mM imidazole. The eluent

686 was concentrated to 500  $\mu$ L and further purified by size-exclusion chromatography in TBS buffer  
687 containing 0.02% GDN. Peak fractions containing TRPM5 were pooled and concentrated to 5  
688 mg/mL for grid freezing.

689

690 For nanodisc reconstitution, the eluent after immobilized metal affinity chromatography was  
691 mixed with MSP2N2 and soybean lipid extract at a molar ratio of 1:1:200  
692 (TRPM5:MSP2N2:lipid). Three rounds of Bio-Beads (BIO-RAD) incubation at 4  $^{\circ}$ C was  
693 performed to facilitate nanodisc reconstitution. The Bio-Beads were then removed, and the  
694 sample was concentrated to 500  $\mu$ L using an Amicon 100 kDa concentrator (MilliporeSigma).  
695 Size-exclusion chromatography was done in TBS buffer to further purify TRPM5-nanodisc  
696 complex. Peak fractions of TRPM5-nanodisc were collected and concentrated to 5 mg/mL for  
697 freezing grid.

### 698 **EM sample preparation and data acquisition**

699 Freshly purified TRPM5 protein in GDN detergent was mixed with 1 mM EDTA (apo-TRPM5  
700 and apo-TRPM5(E337A)), 5 mM  $\text{Ca}^{2+}$  ( $\text{Ca}^{2+}$ -TRPM5 and  $\text{Ca}^{2+}$ -TRPM5(E337A)) or 6  $\mu$ M  $\text{Ca}^{2+}$   
701 before grid preparation. For TRPM5-nanodisc sample, we added 0.05 mM digitonin to improve  
702 particle distribution on the grid. The apo-TRPM5(nanodisc) condition contains 1 mM EDTA,  
703 and the  $\text{Ca}^{2+}$ -TRPM5(nanodisc) contains 1 mM  $\text{Ca}^{2+}$  and 0.5 mM steviol (Sigma). After mixing  
704 with the designated additives, a 2.5  $\mu$ L aliquot of the sample was applied to a glow-discharged  
705 Quantifoil holey carbon grid (gold, 1.2/1.3  $\mu$ m size/hole space, 300 mesh or gold, 2/1  $\mu$ m  
706 size/hole space, 300 mesh), blotted for 1.5 s at 100% humidity using a Vitrobot Mark III, and  
707 then plunge-frozen in liquid ethane cooled by liquid nitrogen. The grids were loaded into a FEI  
708 Titan Krios transmission electron microscope operating at 300 kV with a nominal magnification

709 of 130,000 $\times$  and an energy filter (20 eV slit width). The apo-TRPM5, Ca<sup>2+</sup>-TRPM5(6  
710  $\mu$ M)(GDN), apo-TRPM5(nanodisc), and Ca<sup>2+</sup>-TRPM5(nanodisc) dataset was recorded by a  
711 Gatan K2 Summit direct electron detector in super-resolution mode with a binned pixel size of  
712 0.521 Å. Each K2 movie was dose-fractionated to 40 frames for 8 s with a total dose of 49.6 e<sup>-</sup>  
713 /Å<sup>2</sup>. The Ca<sup>2+</sup>-TRPM5, Ca<sup>2+</sup>-TRPM5(E337A), NDNA/Ca<sup>2+</sup>-TRPM5 datasets were collected by  
714 a K3 direct electron detector in super-resolution mode with a binned pixel size of 0.413 Å (K3).  
715 Each K3 movie was dose-fractionated to 75 frames for 1.5 s with a total dose of 47 e<sup>-</sup>/Å<sup>2</sup>. The  
716 automated image acquisition was facilitated using SerialEM<sup>42</sup>. The nominal defocus range was  
717 set from -0.9  $\mu$ m to -1.9  $\mu$ m.

#### 718 719 **Cryo-EM data analysis procedure**

720  
721 The detailed workflow of data processing procedure is summarized in Extended Data Fig. 3-5,  
722 11 and Supplementary Fig. 2. In general, the raw tif movie files for each dataset were motion-  
723 corrected and 2x binned using MotionCor2 v1.1.0 or RELION 3.0 (Ref<sup>43,44</sup>). The per-  
724 micrograph defocus values were estimated using Gctf 1.06 or ctffind 4.1 (Ref<sup>45,46</sup>). Particle  
725 picking was performed using gautomatch v0.56 (<https://www2.mrc->  
726 [lmb.cam.ac.uk/research/locally-developed-software/zhang-software/](http://lmb.cam.ac.uk/research/locally-developed-software/zhang-software/)) or topaz v0.2.4 (Ref<sup>47</sup>) or  
727 topaz v0.2.4 (Ref<sup>48</sup>). Junk particles were removed by 2D classification and heterogeneous  
728 refinement using CryoSPARC (v0.6 or v2.09). Selected good particles were then used to  
729 generate an initial 3D model by ab initio reconstruction followed by homogeneous refinement  
730 with C4 symmetry<sup>49</sup>. Multiple rounds of CTF refinement and Bayesian polishing were performed  
731 in relion to further improve the map resolution<sup>50</sup>.

732

733 At this stage, conformational heterogeneity was observed in the transmembrane domain (TMD)  
734 of the consensus refinement, indicating significant flexibility is present for TRPM5, especially in  
735 the extracellular pore loop area. To further improve the map quality, we performed focused  
736 classification by subtracting TMD signals from the particles<sup>51</sup>. After TMD-focused classification,  
737 we focused on the map with the highest nominal resolution and well-defined extracellular region  
738 for atomic model building.

739

740 For the Ca<sup>2+</sup>-TRPM5(E337A) dataset, conformational heterogeneity is still present in the  
741 transmembrane domain after TMD-focused classification. To overcome this issue, we performed  
742 symmetry expansion to the best particle set obtained from the TMD-focused classification and  
743 subtracted the single-subunit signals. Focused classification was conducted at the single-subunit  
744 level followed by 3D refinement. Two distinct conformations of the single subunit are identified  
745 for the Ca<sup>2+</sup>-TRPM5(E337A) dataset. The two conformation differ by the Ca<sup>2+</sup> occupancy in the  
746 transmembrane domain, i.e., apo-TRPM5(E337A) and Ca<sup>2+</sup>-TRPM5(E337A). The single  
747 subunit maps were used for model building. To obtain tetrameric map for apo-TRPM5(E337A)  
748 and Ca<sup>2+</sup>-TRPM5(E337A), we further identified the homotetrameric TRPM5 particles that were  
749 solely composed of particles from each of the single subunit class. Although homo-tetrameric  
750 particles obtained after this procedure were very less, the refinement map still allowed us to  
751 generate a tetrameric model based on the single subunit map (see the model building section).

752

753 For the NDNA/Ca<sup>2+</sup>-TRPM5 dataset, conformational heterogeneity is observed in the ICD after  
754 TMD-focused classification. We then performed symmetry expansion (C4) and subtracted the  
755 ICD for each single subunit of TRPM5 particles. Subsequent 3D classification allowed us to

756 obtain a homogeneous set of single TRPM5 subunit. We then identified homo-tetramer of  
757 TRPM5 that are consists of the homogeneous TRPM5 single subunit and refined the structure.  
758 This allowed us to obtain a map with better defined ICD to assist model building, despite with  
759 slightly worse nominal resolution compared to the consensus refinement before ICD  
760 classification.

761

762 For all dataset, the Gold standard Fourier shell correlation (FSC) 0.143 criteria were used to  
763 provide the map resolution estimate<sup>52</sup>. The cryo-EM maps were visualized using UCSF  
764 ChimeraX<sup>53</sup>.

765

## 766 **Model building**

767

768 The atomic model for apo-TRPM5 was built into the cryo-EM density manually using Coot  
769 v0.89 and subjected to real-space refinement in Phenix<sup>54,55</sup>. The apo-TRPM5 model contained  
770 residues 16-429, 446-473, 489-653, 698-1020, and 1027-1092. One GDN molecule lacking one  
771 of the two maltose groups (GDP), and one diosgenin molecule (DIO) were modeled into the  
772 lipid- or detergent-like densities for each chain. The geometrical restraints for DIO, GDP and  
773 NDNA were generated using the Grade Web Server (<http://grade.globalphasing.org>).

774 Glycosylation at N921 was modeled as N-acetyl-beta-D-glucosamine (NAG). The Ca<sup>2+</sup>-TRPM5  
775 open models were built by first docking the apo-TRPM5 closed model into the corresponding  
776 cryo-EM map density and adjusted manually in Coot. Two Ca<sup>2+</sup> atoms were added to the TMD  
777 and ICD Ca<sup>2+</sup> binding sites of the Ca<sup>2+</sup>-TRPM5 model. The Ca<sup>2+</sup>-TRPM5 open model was of  
778 sufficient resolution to allow us further place two ordered water molecules in the TMD Ca<sup>2+</sup>  
779 binding site, and two water molecules in the selectivity filter for each chain. The apo-  
780 TRPM5(E337A) and Ca<sup>2+</sup>-TRPM5(E337A) model were first built based on the cryo-EM maps

781 of the single-subunit refinement result. The single-subunit model was then rigid-body-fitted into  
782 the tetramer cryo-EM maps reconstructed from homo-tetrameric TRPM5 particles. We did not  
783 build atomic model for Apo-TRPM5(nanodisc) and  $\text{Ca}^{2+}$ -TRPM5(nanodisc) dataset because  
784 these maps are identical to the corresponding maps from the GDN detergent conditions  
785 (Extended Data Fig. 5g). It is worth mentioning that although we included 0.5 mM steviol when  
786 preparing the  $\text{Ca}^{2+}$ -TRPM5(nanodisc) grid, we are not able to identify density that corresponds  
787 to the steviol molecule.

### 788 **Electrophysiology**

789  
790 In the inside-out patch clamp configuration, voltage-clamped membrane currents were measured  
791 from tsA201 cells overexpressing plasmids encoding N-terminal GFP tagged WT and mutant  
792 TRPM5 channels from zebrafish and human. Following 1 d post-transfection with Lipofectamine  
793 2000, cells were trypsinized and replated onto poly-L-lysine-coated (Sigma) glass coverslips.  
794 After cell adherence, the coverslips were transferred to a low-volume recording chamber with a  
795 pH 7.4 bath solution containing (in mM) 150 NaCl, 3 KCl, 10 HEPES, 2  $\text{CaCl}_2$ , 1  $\text{MgCl}_2$ , and 12  
796 mannitol. Cells with fluorescence at the plasma membrane were patched with pipettes containing  
797 a pH 7.4 solution of (in mM) 150 NaCl, 10 HEPES, and 5 EGTA. Upon tight-seal formation, the  
798 bath solution was super-fused with the calcium-free EGTA solution. Following excision, patches  
799 were exposed using a manifold to super-fused bath solutions containing various free calcium  
800 concentrations. For preparing 1, 20, 100, or 1000  $\mu\text{M}$  of free calcium, 4.46, 5.01, 5.1, or 6 mM  
801  $\text{CaCl}_2$  was added to a pH 7.4 solution of 150 mM NaCl, 10 mM HEPES, 5 mM EGTA. Free  
802 calcium concentrations were calculated with  
803 <https://somapp.ucdmc.ucdavis.edu/pharmacology/bers/maxchelator/CaEGTA-TS.htm>. At room  
804 temperature (21-23 °C), patches from a holding voltage of 0 mV were clamped (Clampex 11.0.3,



805 Multiclamp 700 B) using 50-ms steps from +200 mV to -200 mV (intracellular side relative to  
806 extracellular) with a final tail pulse at -140 mV. Electrical signals were digitized at 10 kHz and  
807 filtered at 2 kHz. Typically, measurements of TRPM5 activation by individual bath solutions  
808 containing various calcium concentration were interleaved with measurements where the bath  
809 solution was superfused with calcium-free EGTA solution. Using offline analysis (ClampFit  
810 11.0.3) the currents in the absence of calcium were then subtracted from currents measured in the  
811 presence of calcium to acquire specific calcium-activated currents. Current amplitudes were  
812 measured at the end of the pulse. For normalizing current, the clamp at + 200 mV was chosen.  
813 Whole-cell measurements were performed in tsA201 cells following 1d transfection of zebrafish  
814 TRPM5 Ca<sub>TMD</sub> mutant channels. Patch pipettes were filled with a 1  $\mu$ M free calcium  
815 concentration solution (pH 7.4) composed of (in mM): 150 NaCl, 1 MgCl<sub>2</sub>, 10 Hepes, 5 EGTA,  
816 4.45 CaCl<sub>2</sub>. The bath solution (pH 7.4) contained (in mM) 150 NaCl, 3 KCl, 10 Hepes, 2 CaCl<sub>2</sub>,  
817 1 MgCl<sub>2</sub>, and 12 mannitol. Voltage clamps (50ms steps from +200 to -200 mV) were imposed  
818 approximately 1 minute after the whole cell configuration was acquired. Analysis was performed  
819 with GraphPad.

820

821 For determining the IC<sub>50</sub> of NDNA, whole cell current analysis was performed where TRPM5  
822 currents were evoked with 1  $\mu$ M calcium in the patch pipette (as described above). Upon whole  
823 cell acquisition, currents were first measured in bath solution and then re-measured 30-60 s  
824 following super-fusion of bath solution containing various NDNA concentrations (1 fM, 10 pM,  
825 100 pM, 1 nM, 100 nM, 0.5  $\mu$ M, 10  $\mu$ M). NDNA was stored at 50 mM (DMSO) and serially  
826 diluted using bath solution. For each cell measured, only one concentration of NDNA was tested.  
827 Inhibition kinetics was monitored using a step protocol (+100 mV) and typically complete

828 (steady-state current) within a minute. Inhibited current was plotted as a function of NDNA  
829 concentration and fitted using Prism software (inhibitor versus response, variable slope equation).

830 **Preparation of *N'*-(3,4-dimethoxybenzylidene)-2-(naphthalen-1-yl)acetohydrazide**  
831 **(compound NDNA)**

832  
833 *N'*-(3,4-dimethoxybenzylidene)-2-(naphthalen-1-yl)acetohydrazide (NDNA) was synthesized  
834 according to the US Patent US8193168 (Bryant et al., 2008) (Supplementary Figure 4a). Briefly,  
835 A solution of commercial available ethyl 2-(naphthalen-1-yl)acetate (compound 1) (20 g, 93.34  
836 mmol, 1 *eq*), NH<sub>2</sub>NH<sub>2</sub>·H<sub>2</sub>O (9.54 g, 186.69 mmol, 9.26 mL, 2 *eq*) in EtOH (100 mL) was stirred  
837 at 80°C for 16 h. TLC (Petroleum ether/Ethyl acetate = 2/1) showed that most of the compound 1  
838 ( $R_f = 0.5$ ) was consumed and a new spot ( $R_f = 0.05$ ) was given. The reaction mixture was  
839 concentrated under vacuum to give white solid. The white solid was triturated with Petroleum  
840 ether/Ethyl acetate = 4:1 (100 mL) for 10 min. The mixture was filtered, and the filter cake was  
841 dried under vacuum to give the tittle compound 2 (12.8 g, 59.58 mmol, 63.8% yield, 93.2%  
842 purity) as a white solid. <sup>1</sup>H NMR (400 MHz, DMSO-*d*<sub>6</sub>, see Supplementary Figure 4b upper  
843 panel)  $\delta$  ppm 9.34 (s, 1H), 8.13 (d,  $J = 8.4$  Hz, 1H), 7.92 (d,  $J = 7.6$  Hz, 1H), 7.81 (d,  $J = 5.6$  Hz,  
844 1H), 7.54-7.51 (m, 2H), 7.45-7.44 (m, 2H), 4.25 (s, 2H), 3.84 (s, 2H). LCMS 0-60% ACN-H<sub>2</sub>O,  
845 ESI + APCI:  $R_t = 0.767$  min,  $m/z = 201.1$  (M+H)<sup>+</sup>.

846 A solution of 2-(naphthalen-1-yl)acetohydrazide (compound 2) (10.8 g, 50.27 mmol, 1 *eq*)  
847 and 3,4-dimethoxybenzaldehyde (compound 3) (8.35 g, 50.27 mmol, 1 *eq*) in EtOH (50 mL) was  
848 stirred at 80°C for 30 min. A white solid separated out. TLC (Petroleum ether /Ethyl acetate =  
849 1/1) showed that compound 2 ( $R_f = 0.1$ ) was consumed and a major spot ( $R_f = 0.3$ ) formed. The  
850 reaction mixture was cooled to 20°C. 100 mL EtOH was added to above solution and stirred for  
851 10 min. The mixture was filtered and the filter cake was dried under vacuum to give NDNA

852 (9.20 g, 26.33 mmol, 52.3% yield, 99.7% purity) as a white solid. <sup>1</sup>H NMR (400 MHz, DMSO-  
853 *d*<sub>6</sub>, see Supplementary Figure 4b lower panel) δ ppm 11.06-11.38 (m, 1H), 8.18 (m, 1.4H), 7.96  
854 (m, 1.6H), 7.93 (m, 1H), 7.55-7.48 (m, 4H), 7.31-7.30 (m, 1H), 7.18 (m, 1H), 7.01-6.99 (m, 1H),  
855 4.53-4.23 (m, 2H), 3.80-3.65 (m, 6H). LCMS 5-95% ACN-H<sub>2</sub>O, ESI + APCI Rt = 0.826 min,  
856 m/z = 349.0 (M+H)<sup>+</sup>.

857

## 858 **References:**

- 859 1. Zhang, Y. *et al.* Coding of sweet, bitter, and umami tastes: Different receptor cells sharing  
860 similar signaling pathways. *Cell* **112**, 293–301 (2003).
- 861 2. Brixel, L. R. *et al.* TRPM5 regulates glucose-stimulated insulin secretion. *Pflugers Arch.*  
862 **460**, 69–76 (2010).
- 863 3. Colsoul, B. *et al.* Loss of high-frequency glucose-induced Ca<sup>2+</sup> oscillations in pancreatic  
864 islets correlates with impaired glucose tolerance in *Trpm5*<sup>-/-</sup> mice. *Proc. Natl. Acad. Sci.*  
865 *U. S. A.* **107**, 5208–5213 (2010).
- 866 4. Zhang, Z., Zhao, Z., Margolskee, R. & Liman, E. The Transduction Channel TRPM5 Is  
867 Gated by Intracellular Calcium in Taste Cells. *J. Neurosci.* **27**, 5777 LP – 5786 (2007).
- 868 5. Bryant, R. *et al.* Use of a *trpm5* inhibitor to regulate insulin and *glp-1* release. (2008).
- 869 6. Huang, Y., Fliegert, R., Guse, A. H., Lü, W. & Du, J. A structural overview of the ion  
870 channels of the TRPM family. *Cell Calcium* **85**, 102111 (2020).
- 871 7. Pérez, C. A. *et al.* A transient receptor potential channel expressed in taste receptor cells.  
872 *Nat. Neurosci.* **5**, 1169–1176 (2002).
- 873 8. Roper, S. D. Signal transduction and information processing in mammalian taste buds.  
874 *Pflugers Arch.* **454**, 759–776 (2007).

- 875 9. Taruno, A. *et al.* CALHM1 ion channel mediates purinergic neurotransmission of sweet,  
876 bitter and umami tastes. *Nature* **495**, 223–226 (2013).
- 877 10. Howitt, M. R. *et al.* Tuft cells, taste-chemosensory cells, orchestrate parasite type 2  
878 immunity in the gut. *Science (80-. )*. **351**, 1329 LP – 1333 (2016).
- 879 11. Vennekens, R., Mesuere, M. & Philippaert, K. TRPM5 in the battle against diabetes and  
880 obesity. *Acta Physiol.* **222**, e12949 (2018).
- 881 12. Nilius, B. & Owsianik, G. The transient receptor potential family of ion channels. *Genome*  
882 *Biol.* **12**, 218 (2011).
- 883 13. Owsianik, G., Talavera, K., Voets, T. & Nilius, B. Permeation and selectivity of TRP  
884 channels. *Annu. Rev. Physiol.* **68**, 685–717 (2006).
- 885 14. Hofmann, T. *et al.* TRPM5 is a voltage-modulated and Ca(2+)-activated monovalent  
886 selective cation channel. *Curr. Biol.* **100**, 15166–15171 (2003).
- 887 15. Prawitt, D. *et al.* TRPM5 is a transient Ca<sup>2+</sup>-activated cation channel responding to rapid  
888 changes in [Ca<sup>2+</sup>]<sub>i</sub>. *Proc. Natl. Acad. Sci. U. S. A.* **100**, 15166–15171 (2003).
- 889 16. Liman, E. R. The Ca(2+)-Activated TRP Channels: TRPM4 and TRPM5. in (eds. Liedtke,  
890 W. B. & Heller, S.) (2007).
- 891 17. Ullrich, N. D. *et al.* Comparison of functional properties of the Ca<sup>2+</sup>-activated cation  
892 channels TRPM4 and TRPM5 from mice. *Cell Calcium* **37**, 267–278 (2005).
- 893 18. Nilius, B., Prenen, J., Janssens, A., Voets, T. & Droogmans, G. Decavanadate modulates  
894 gating of TRPM4 cation channels. *J. Physiol.* **560**, 753–765 (2004).
- 895 19. Philippaert, K. *et al.* Steviol glycosides enhance pancreatic beta-cell function and taste  
896 sensation by potentiation of TRPM5 channel activity. *Nat. Commun.* **8**, 14733 (2017).
- 897 20. Guo, J. *et al.* Structures of the calcium-activated, non-selective cation channel TRPM4.

- 898 *Nature* **552**, 205–209 (2017).
- 899 21. Winkler, P. A., Huang, Y., Sun, W., Du, J. & Lü, W. Electron cryo-microscopy structure  
900 of a human TRPM4 channel. *Nature* **552**, 200–204 (2017).
- 901 22. Autzen, H. E. *et al.* Structure of the human TRPM4 ion channel in a lipid nanodisc.  
902 *Science* **359**, 228–232 (2018).
- 903 23. Duan, J. *et al.* Structure of full-length human TRPM4. *Proc. Natl. Acad. Sci. U. S. A.* **115**,  
904 2377–2382 (2018).
- 905 24. Diver, M. M., Cheng, Y. & Julius, D. Structural insights into TRPM8 inhibition and  
906 desensitization. *Science* **365**, 1434–1440 (2019).
- 907 25. Yin, Y. *et al.* Structural basis of cooling agent and lipid sensing by the cold-activated  
908 TRPM8 channel. *Science* **363**, (2019).
- 909 26. Mähler, J. & Persson, I. A study of the hydration of the alkali metal ions in aqueous  
910 solution. *Inorg. Chem.* **51**, 425–438 (2012).
- 911 27. Huffer, K. E., Aleksandrova, A. A., Jara-Oseguera, A., Forrest, L. R. & Swartz, K. J.  
912 Global alignment and assessment of TRP channel transmembrane domain structures to  
913 explore functional mechanisms. *Elife* **9**, (2020).
- 914 28. Nilius, B. *et al.* The selectivity filter of the cation channel TRPM4. *J. Biol. Chem.* **280**,  
915 22899–22906 (2005).
- 916 29. Tang, L. *et al.* Structural basis for Ca<sup>2+</sup> selectivity of a voltage-gated calcium channel.  
917 *Nature* **505**, 56–61 (2014).
- 918 30. Yamaguchi, S., Tanimoto, A., Iwasa, S. & Otsuguro, K.-I. TRPM4 and TRPM5 Channels  
919 Share Crucial Amino Acid Residues for Ca(2+) Sensitivity but Not Significance of  
920 PI(4,5)P(2). *Int. J. Mol. Sci.* **20**, (2019).

- 921 31. Zhang, Z., Tóth, B., Szollosi, A., Chen, J. & Csanády, L. Structure of a TRPM2 channel in  
922 complex with Ca(2+) explains unique gating regulation. *Elife* **7**, (2018).
- 923 32. Nilius, B. *et al.* The Ca<sup>2+</sup>-activated cation channel TRPM4 is regulated by  
924 phosphatidylinositol 4,5-biphosphate. *EMBO J.* **25**, 467–478 (2006).
- 925 33. Tabur, S. *et al.* Role of the transient receptor potential (TRP) channel gene expressions  
926 and TRP melastatin (TRPM) channel gene polymorphisms in obesity-related metabolic  
927 syndrome. *Eur. Rev. Med. Pharmacol. Sci.* **19**, 1388–1397 (2015).
- 928 34. Valente, P. *et al.* Identification of molecular determinants of channel gating in the  
929 transient receptor potential box of vanilloid receptor I. *FASEB J. Off. Publ. Fed. Am. Soc.*  
930 *Exp. Biol.* **22**, 3298–3309 (2008).
- 931 35. Gregorio-Teruel, L., Valente, P., González-Ros, J. M., Fernández-Ballester, G. & Ferrer-  
932 Montiel, A. Mutation of I696 and W697 in the TRP box of vanilloid receptor subtype I  
933 modulates allosteric channel activation. *J. Gen. Physiol.* **143**, 361–375 (2014).
- 934 36. Teng, J., Loukin, S. H., Anishkin, A. & Kung, C. L596–W733 bond between the start of  
935 the S4–S5 linker and the TRP box stabilizes the closed state of TRPV4 channel. *Proc.*  
936 *Natl. Acad. Sci.* **112**, 3386 LP – 3391 (2015).
- 937 37. Huang, Y., Winkler, P. A., Sun, W., Lü, W. & Du, J. Architecture of the TRPM2 channel  
938 and its activation mechanism by ADP-ribose and calcium. *Nature* **562**, 145–149 (2018).
- 939 38. Huang, Y., Roth, B., Lü, W. & Du, J. Ligand recognition and gating mechanism through  
940 three ligand-binding sites of human TRPM2 channel. *Elife* **8**, (2019).
- 941 39. Wang, L. *et al.* Structures and gating mechanism of human TRPM2. *Science* **362**, (2018).
- 942 40. McGuffin, L. J., Bryson, K. & Jones, D. T. The PSIPRED protein structure prediction  
943 server. *Bioinformatics* **16**, 404–405 (2000).

- 944 41. Goehring, A. *et al.* Screening and large-scale expression of membrane proteins in  
945 mammalian cells for structural studies. *Nat. Protoc.* **9**, 2574–2585 (2014).
- 946 42. Mastronarde, D. N. Automated electron microscope tomography using robust prediction  
947 of specimen movements. *J. Struct. Biol.* **152**, 36–51 (2005).
- 948 43. Zheng, S. Q. *et al.* MotionCor2: anisotropic correction of beam-induced motion for  
949 improved cryo-electron microscopy. *Nat. Methods* **14**, 331–332 (2017).
- 950 44. Scheres, S. H. W. RELION: implementation of a Bayesian approach to cryo-EM structure  
951 determination. *J. Struct. Biol.* **180**, 519–530 (2012).
- 952 45. Zhang, K. Gctf: Real-time CTF determination and correction. *J. Struct. Biol.* **193**, 1–12  
953 (2016).
- 954 46. Rohou, A. & Grigorieff, N. CTFFIND4: Fast and accurate defocus estimation from  
955 electron micrographs. *J. Struct. Biol.* **192**, 216–221 (2015).
- 956 47. Bepler, T. *et al.* Positive-unlabeled convolutional neural networks for particle picking in  
957 cryo-electron micrographs. *Res. Comput. Mol. Biol. ... Annu. Int. Conf. RECOMB ...*  
958 *proceedings. RECOMB (Conference 2005-)* **10812**, 245–247 (2018).
- 959 48. Bepler, T. *et al.* Positive-unlabeled convolutional neural networks for particle picking in  
960 cryo-electron micrographs. *Nat. Methods* **16**, 1153–1160 (2019).
- 961 49. Punjani, A., Rubinstein, J. L., Fleet, D. J. & Brubaker, M. A. cryoSPARC: algorithms for  
962 rapid unsupervised cryo-EM structure determination. *Nat. Methods* **14**, 290–296 (2017).
- 963 50. Zivanov, J., Nakane, T. & Scheres, S. H. W. A Bayesian approach to beam-induced  
964 motion correction in cryo-EM single-particle analysis. *IUCrJ* **6**, 5–17 (2019).
- 965 51. Bai, X., Rajendra, E., Yang, G., Shi, Y. & Scheres, S. H. W. Sampling the conformational  
966 space of the catalytic subunit of human  $\gamma$ -secretase. *Elife* **4**, (2015).

- 967 52. Rosenthal, P. B. & Henderson, R. Optimal determination of particle orientation, absolute  
968 hand, and contrast loss in single-particle electron cryomicroscopy. *J. Mol. Biol.* **333**, 721–  
969 745 (2003).
- 970 53. Goddard, T. D. *et al.* UCSF ChimeraX: Meeting modern challenges in visualization and  
971 analysis. *Protein Sci.* **27**, 14–25 (2018).
- 972 54. Emsley, P. & Cowtan, K. Coot: model-building tools for molecular graphics. *Acta*  
973 *Crystallogr. D. Biol. Crystallogr.* **60**, 2126–2132 (2004).
- 974 55. Afonine, P. V *et al.* New tools for the analysis and validation of cryo-EM maps and  
975 atomic models. *Acta Crystallogr. Sect. D, Struct. Biol.* **74**, 814–840 (2018).
- 976



**Figure 1**

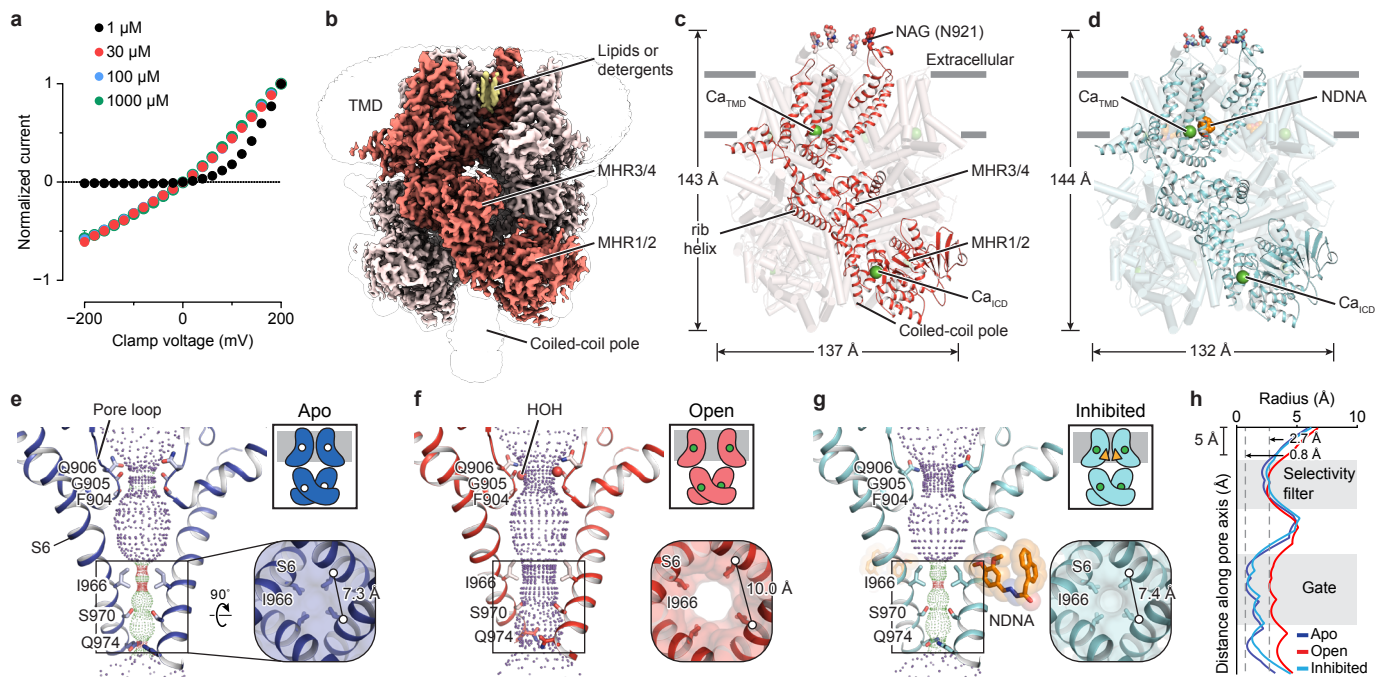

**Figure 2**

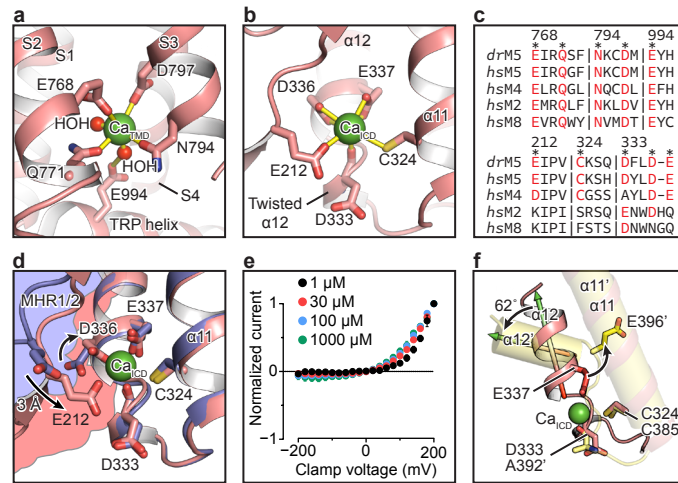

**Figure 3**

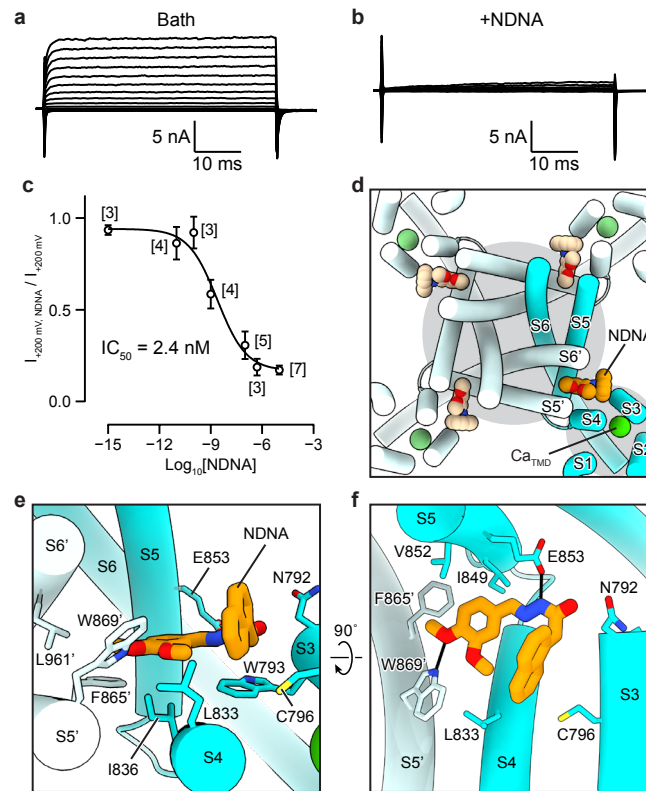

**Figure 4**

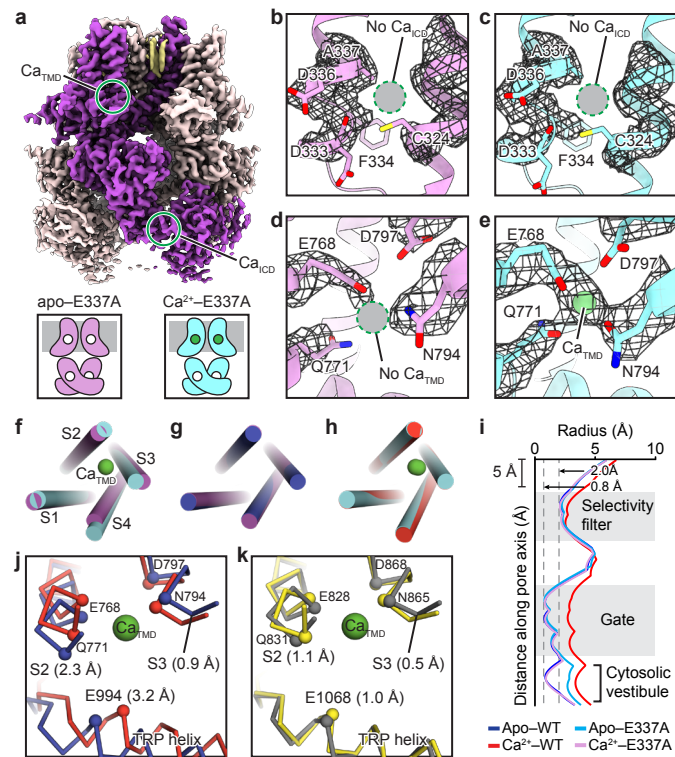

### Figure 5

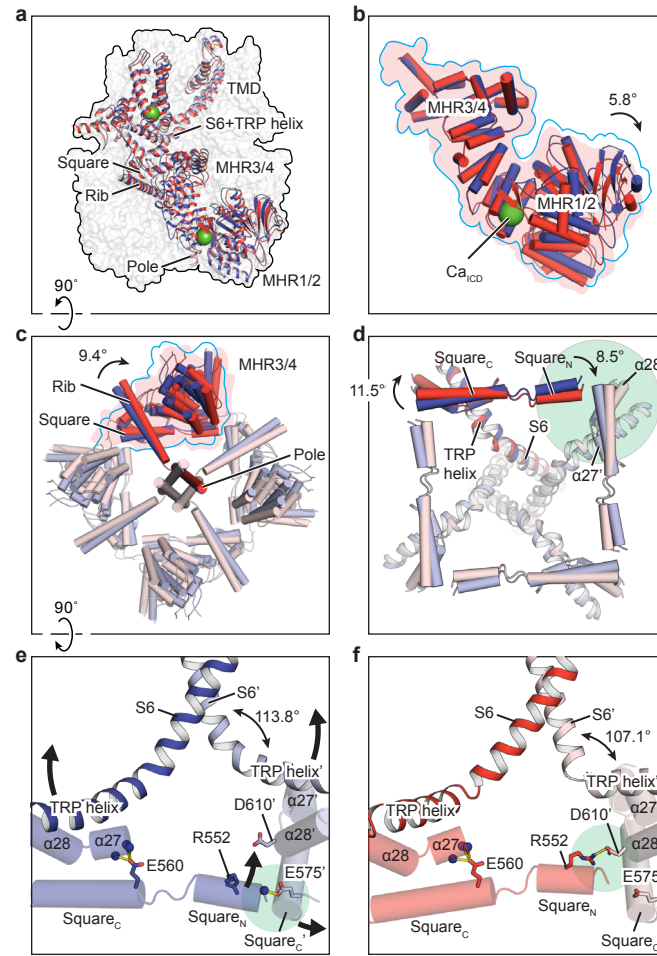

**Figure 6**

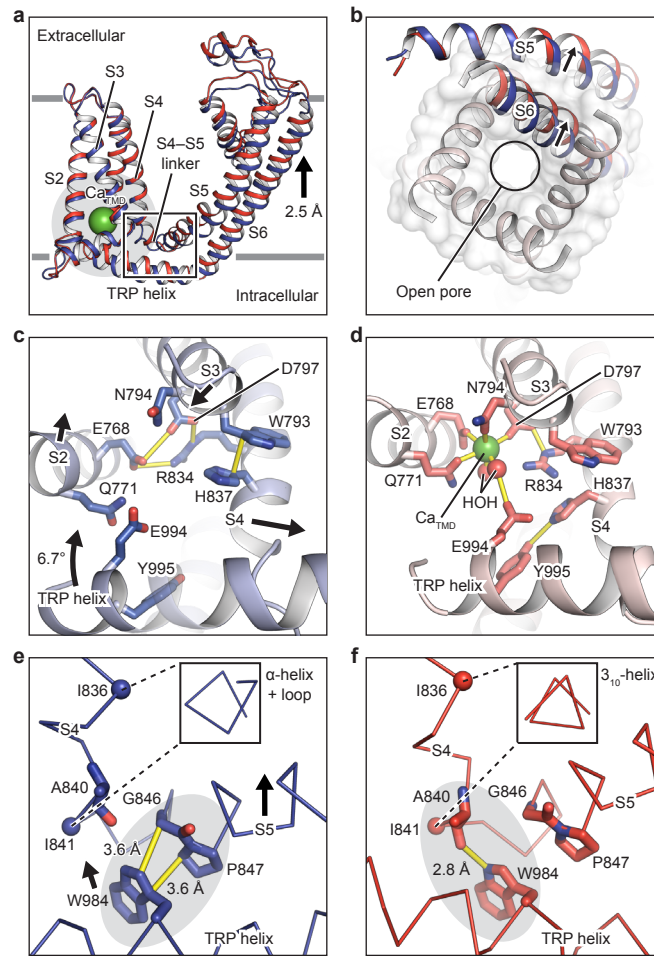

**Figure 7**

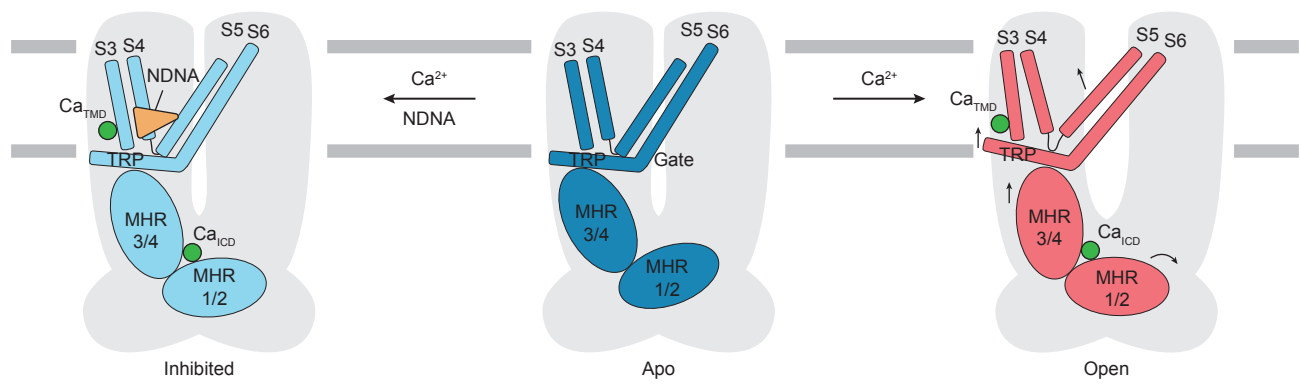

**ED Fig. 1**

bioRxiv preprint doi: <https://doi.org/10.1101/2021.03.25.437100>; this version posted March 26, 2021. The copyright holder for this preprint (which was not certified by peer review) is the author/funder. All rights reserved. No reuse allowed without permission.

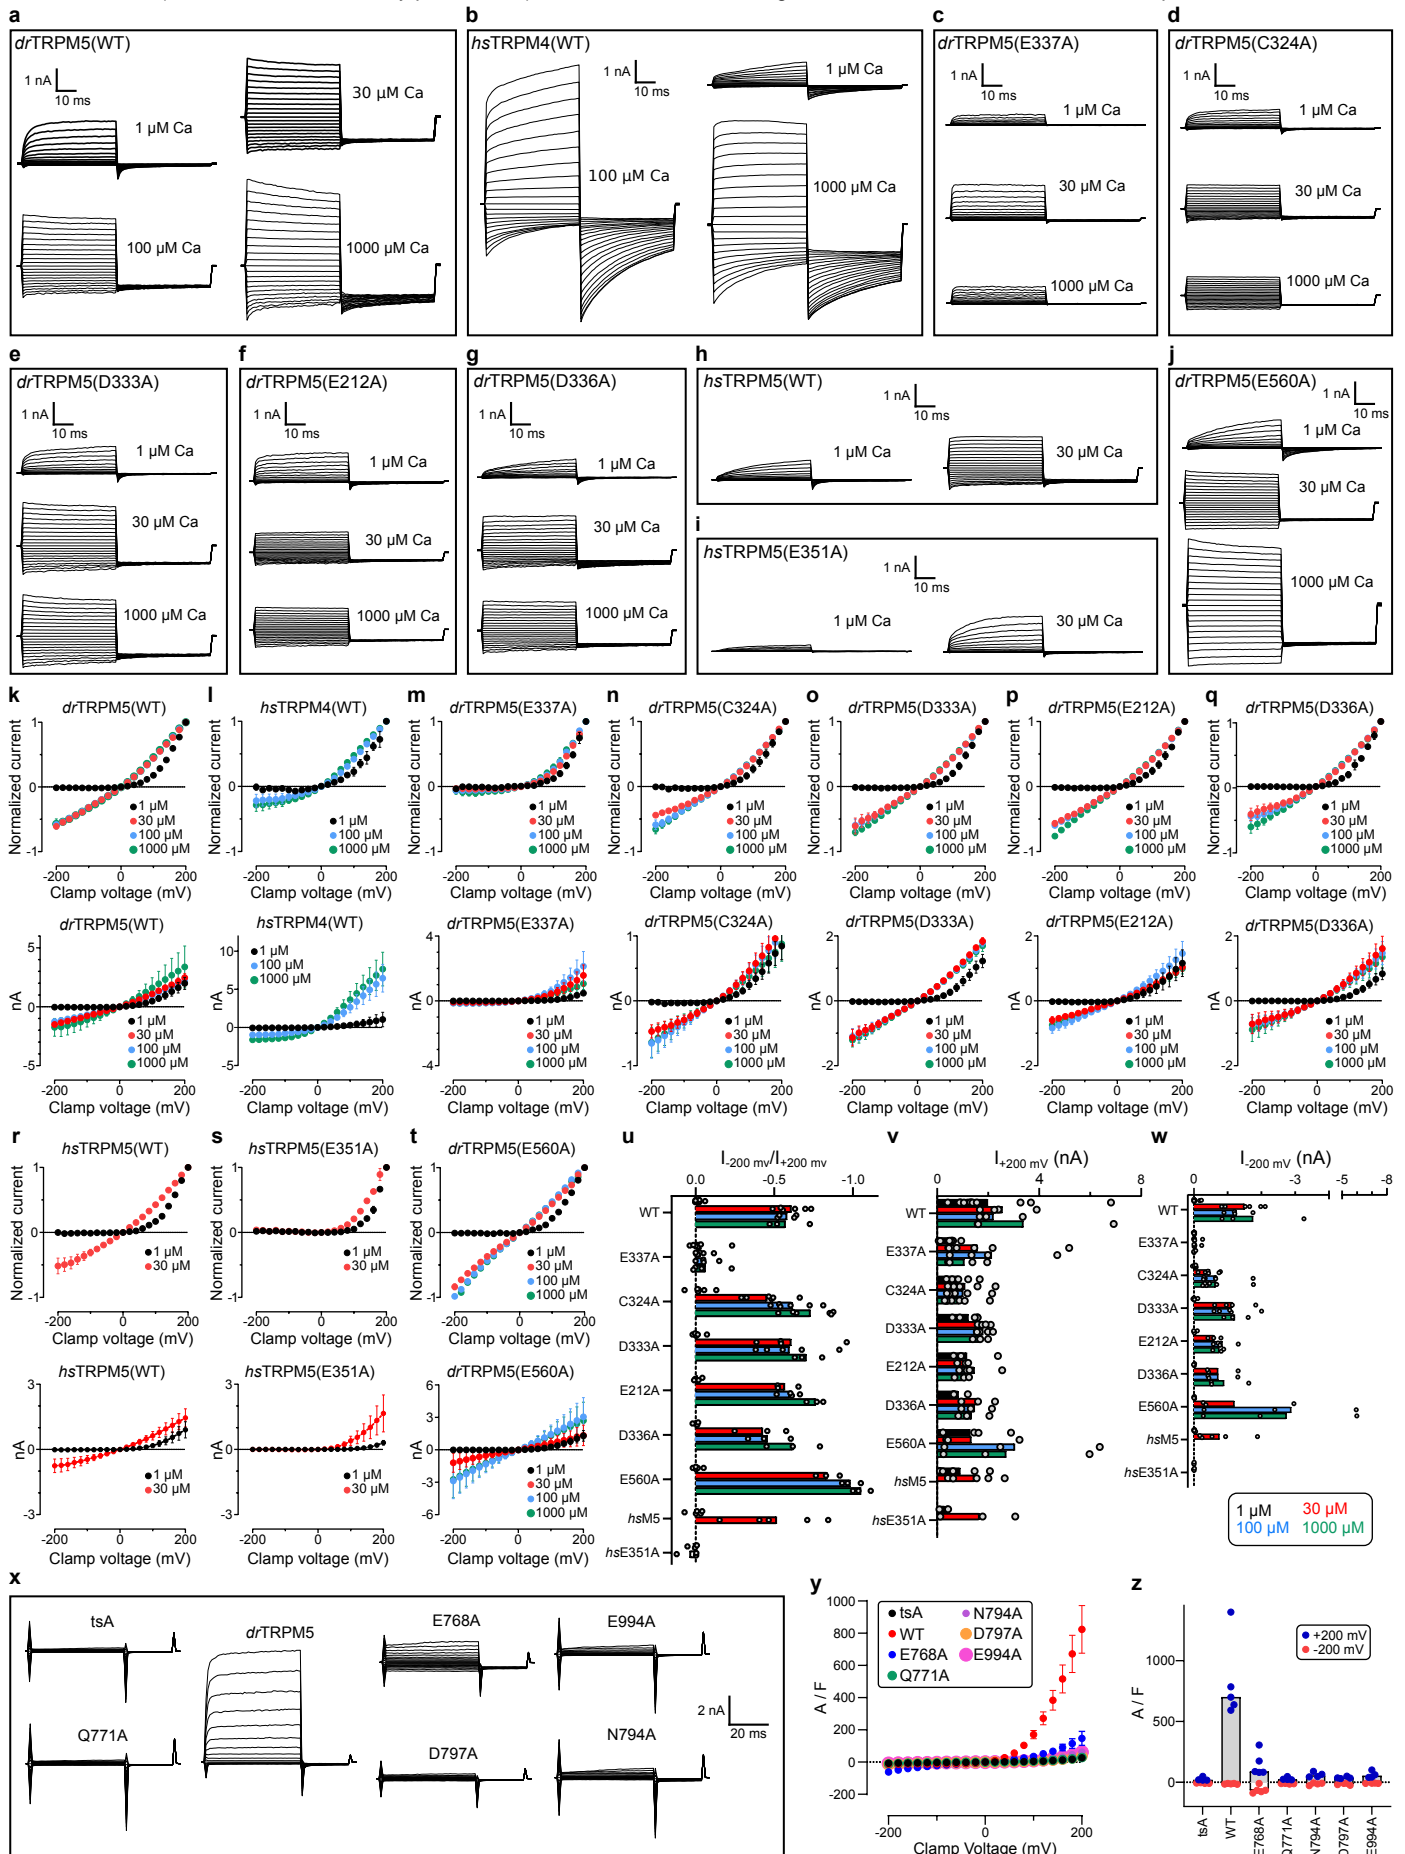



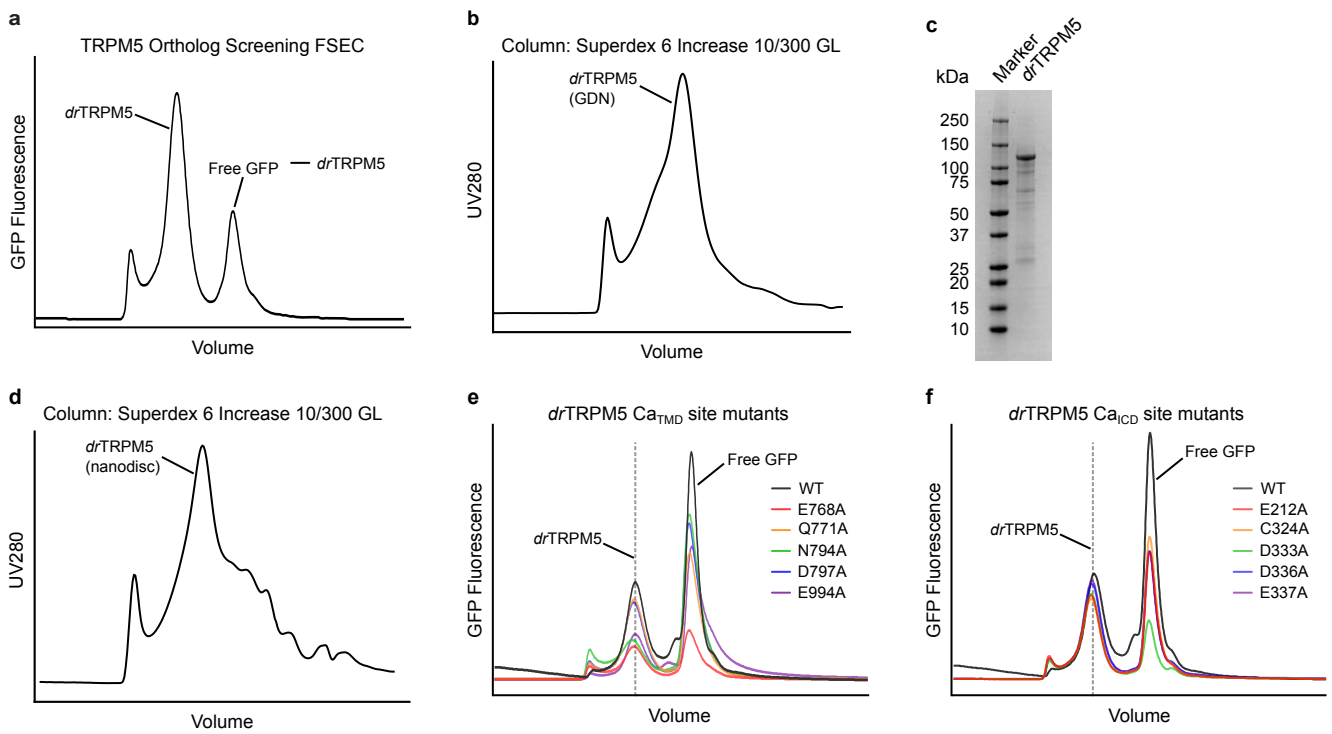

# ED Fig. 3

a bioRxiv preprint doi: <https://doi.org/10.1101/2021.03.25.437100>; this version posted March 26, 2021. The copyright holder for this preprint (which was not certified by peer review) is the author/funder. All rights reserved. No reuse allowed without permission.

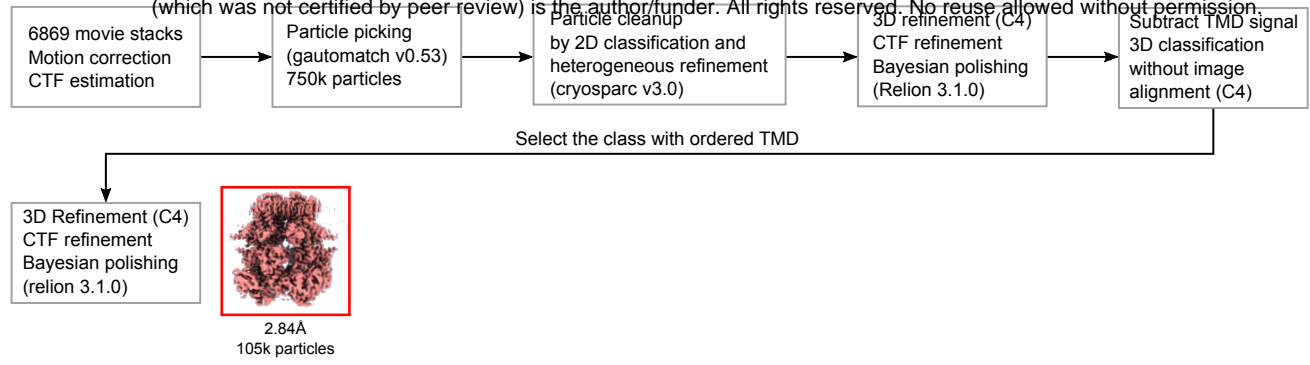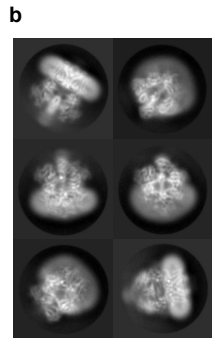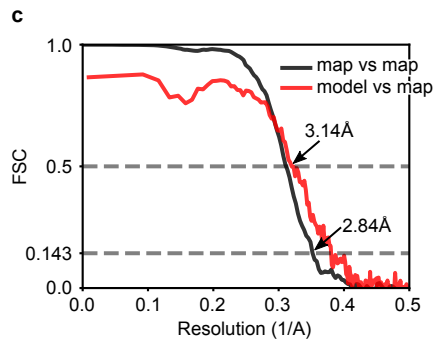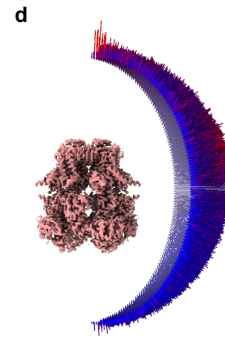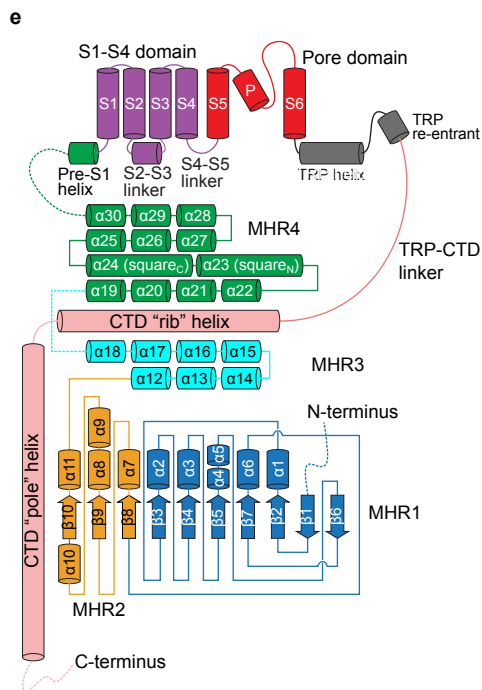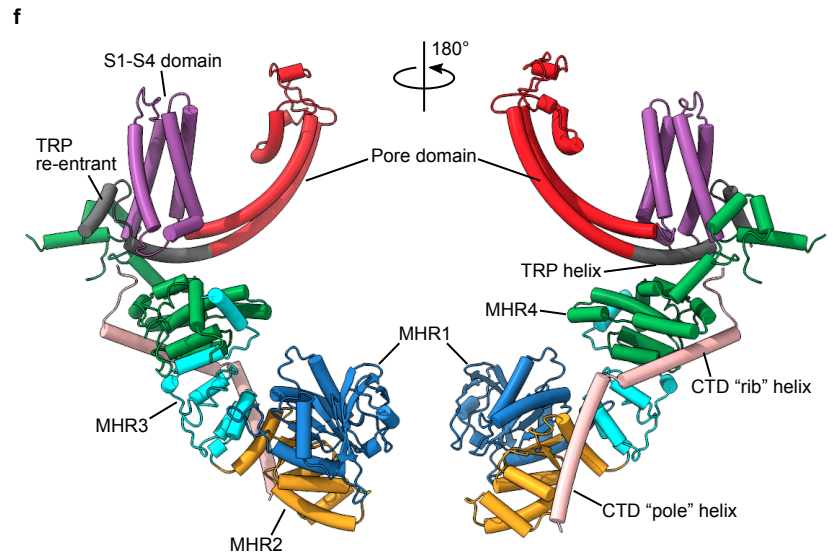

## ED Fig. 4

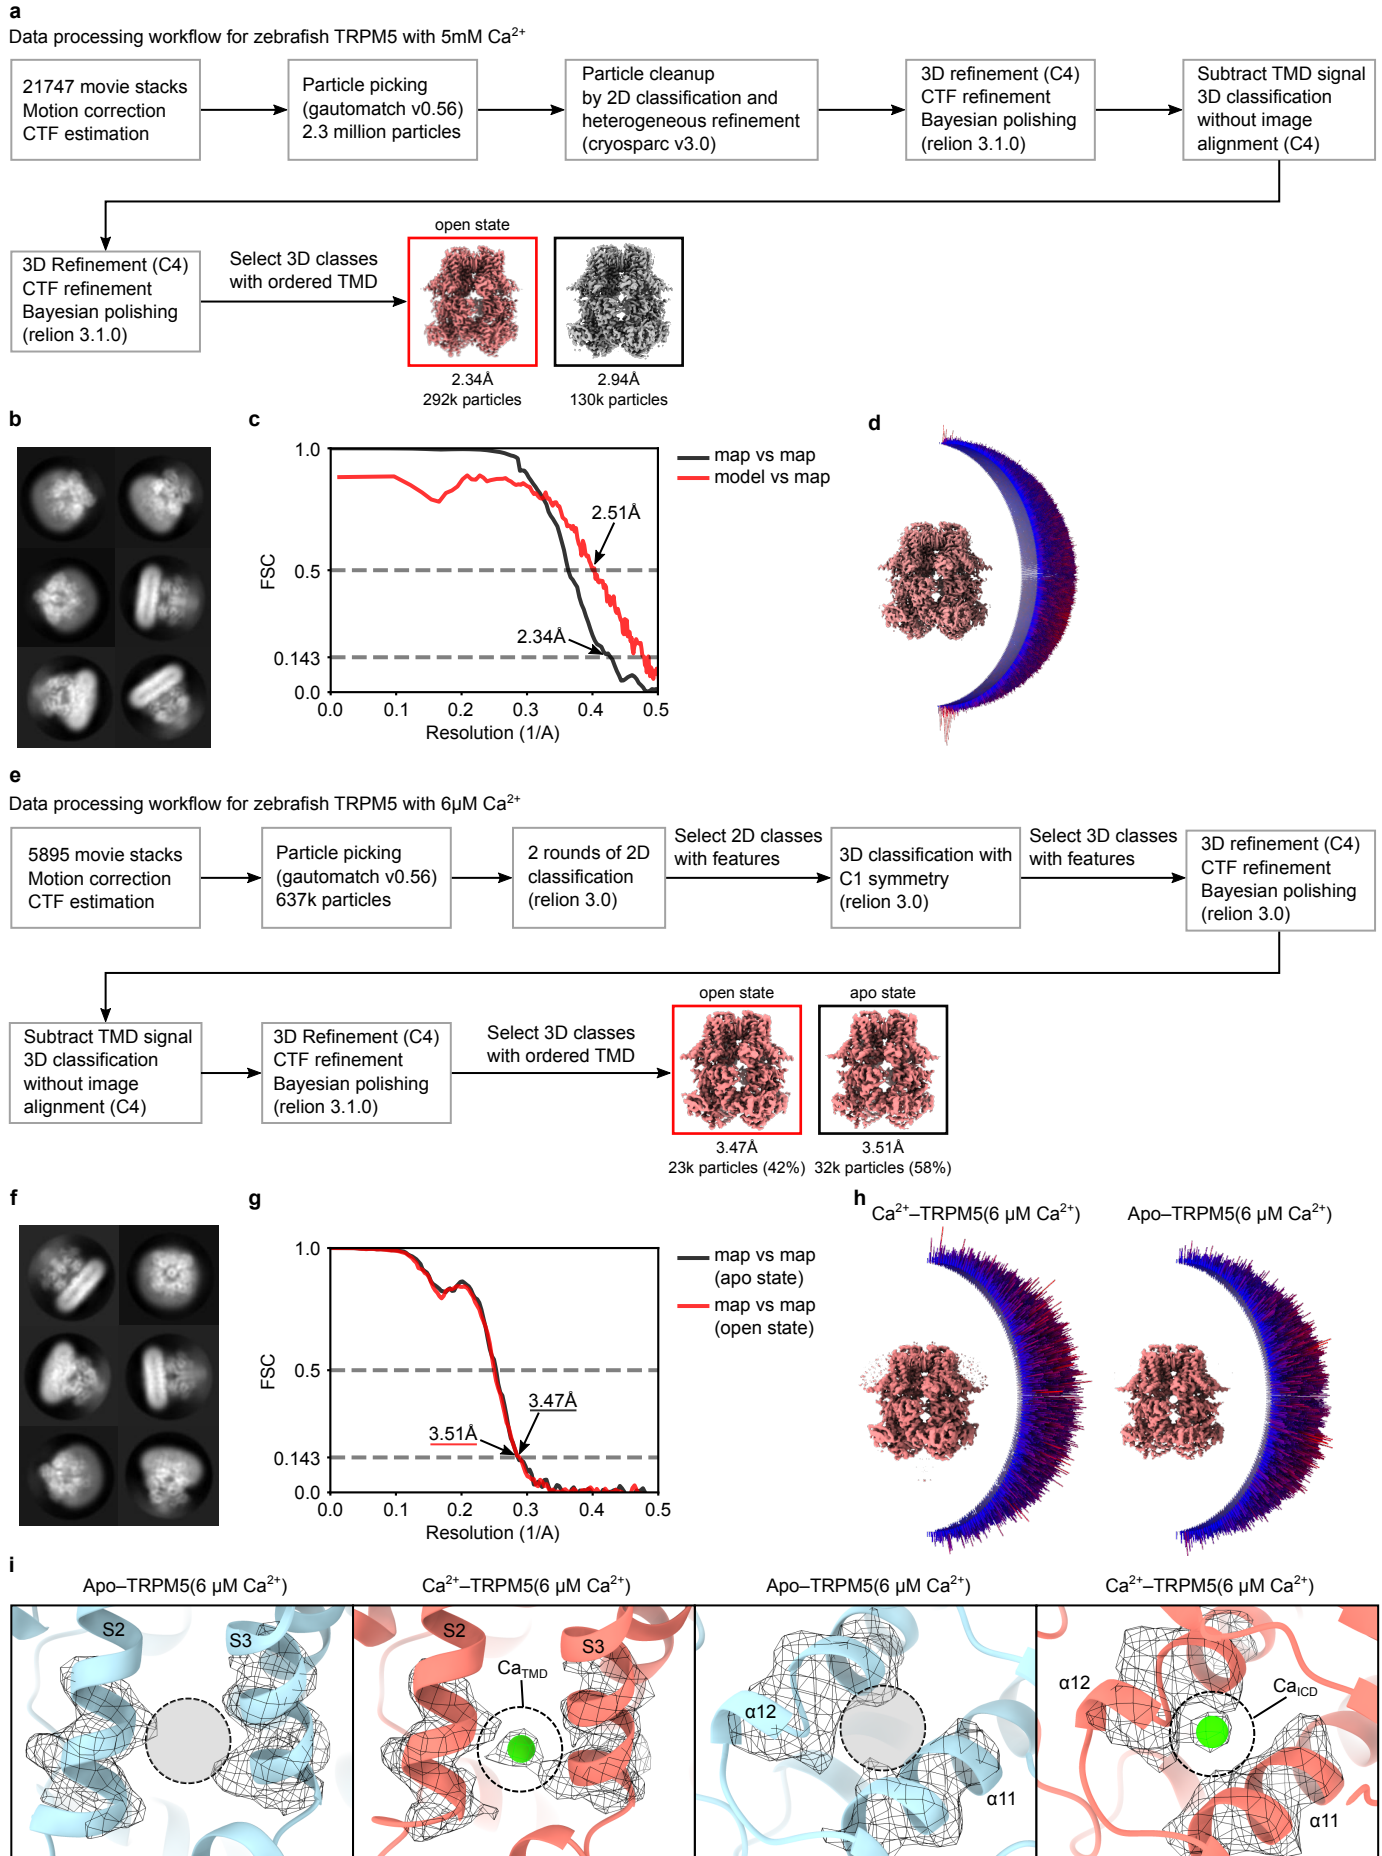

## ED Fig. 5

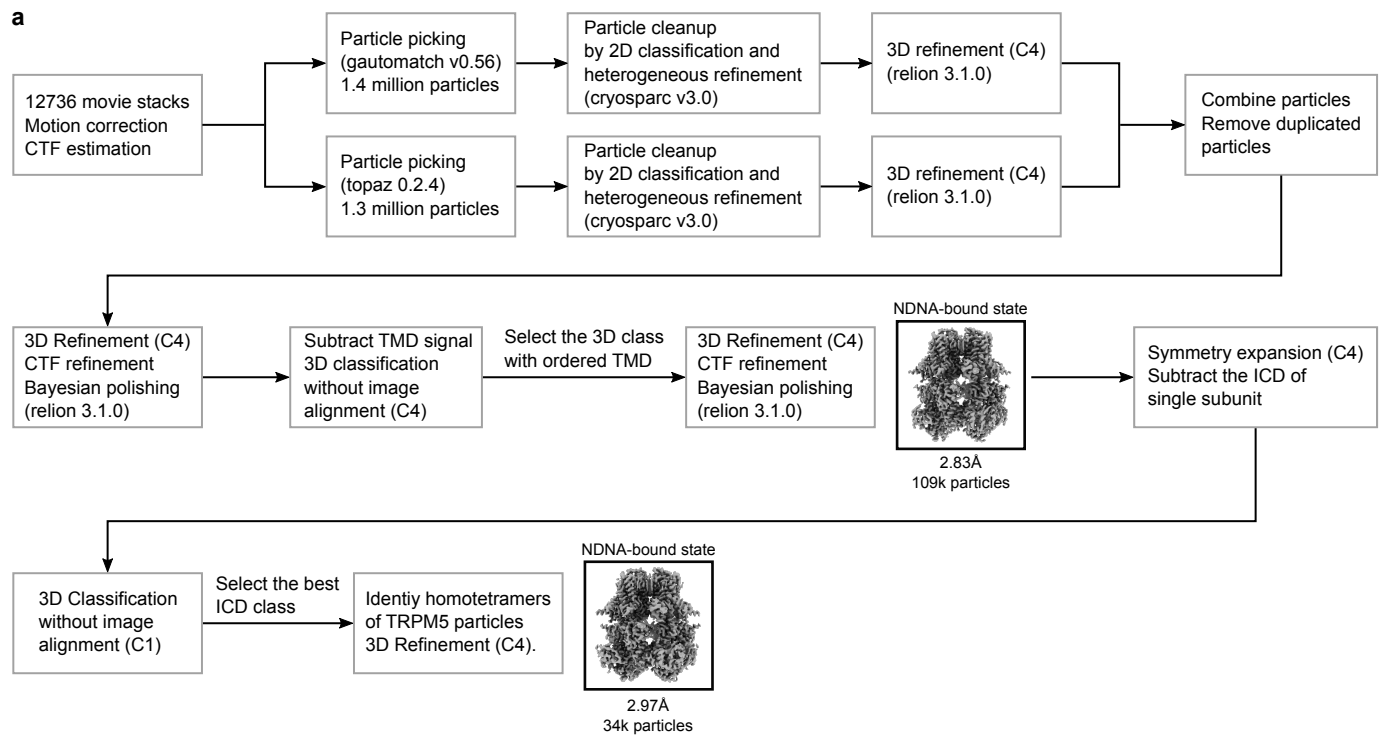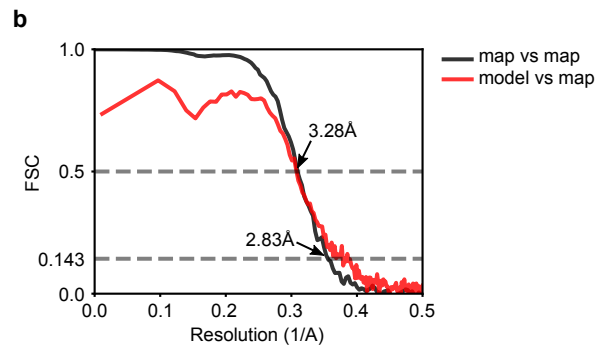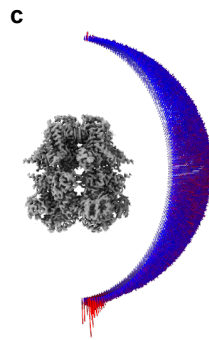

## ED Fig. 6

a bioRxiv preprint doi: <https://doi.org/10.1101/2021.03.25.437100>; this version posted March 26, 2021. The copyright holder for this preprint (which was not certified by peer review) is the author/funder. All rights reserved. No reuse allowed without permission.

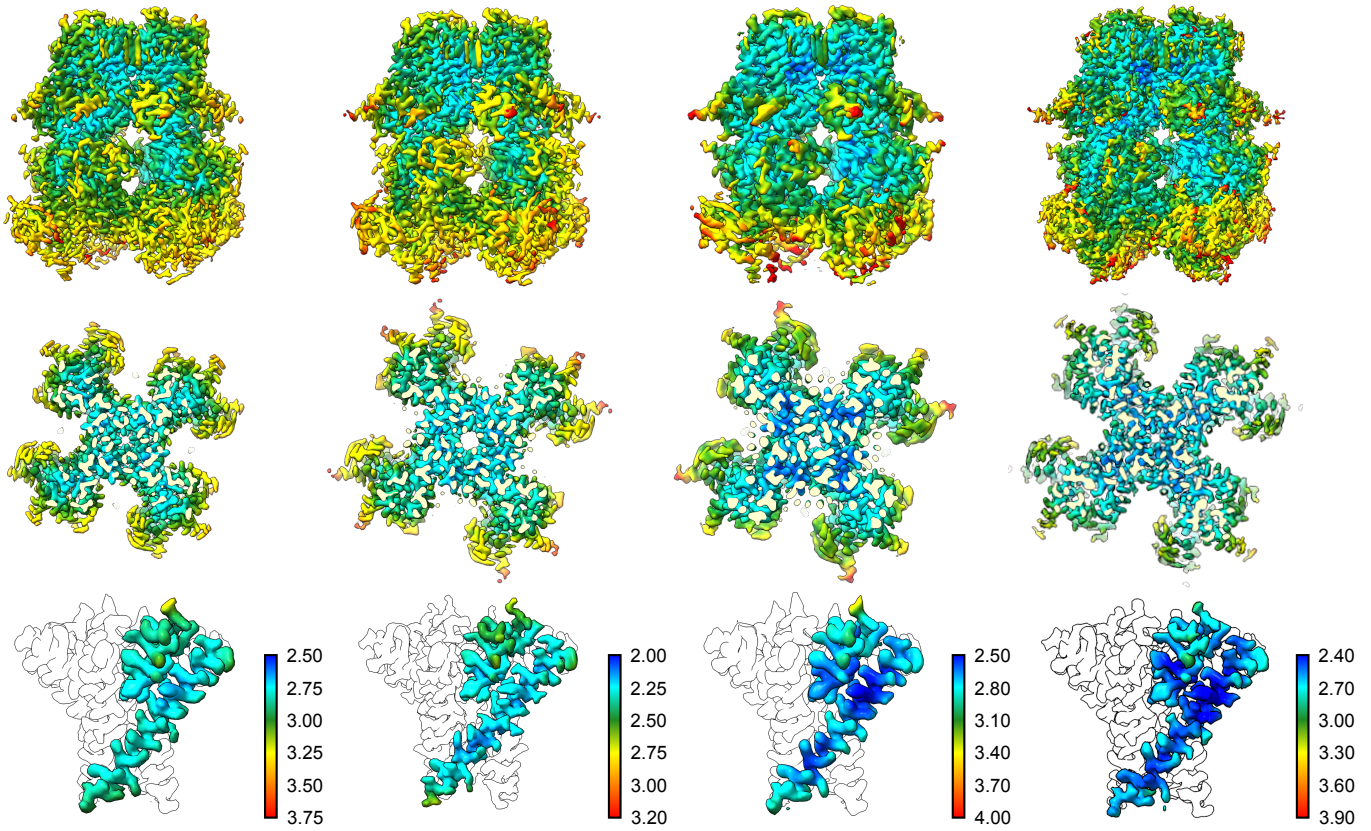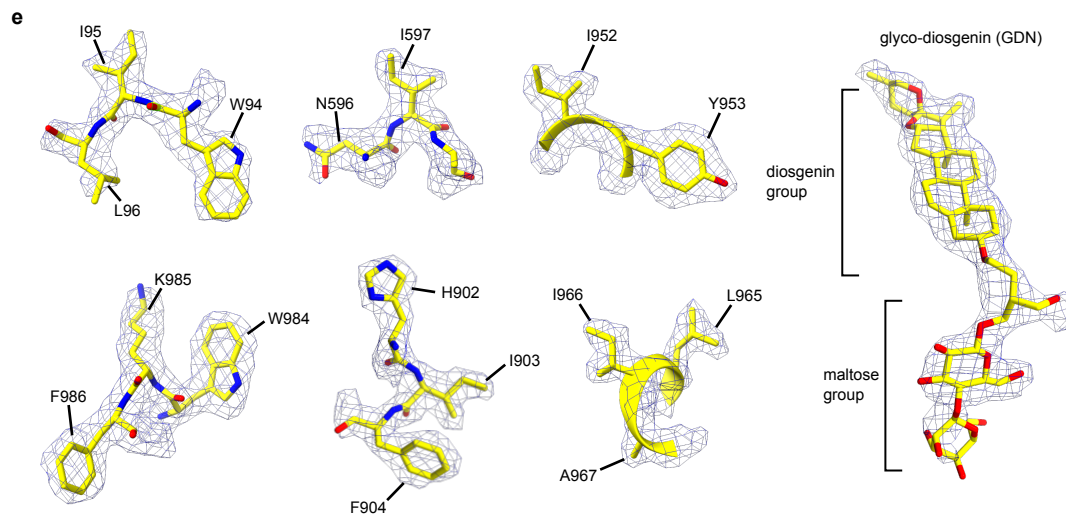



## ED Figure 7

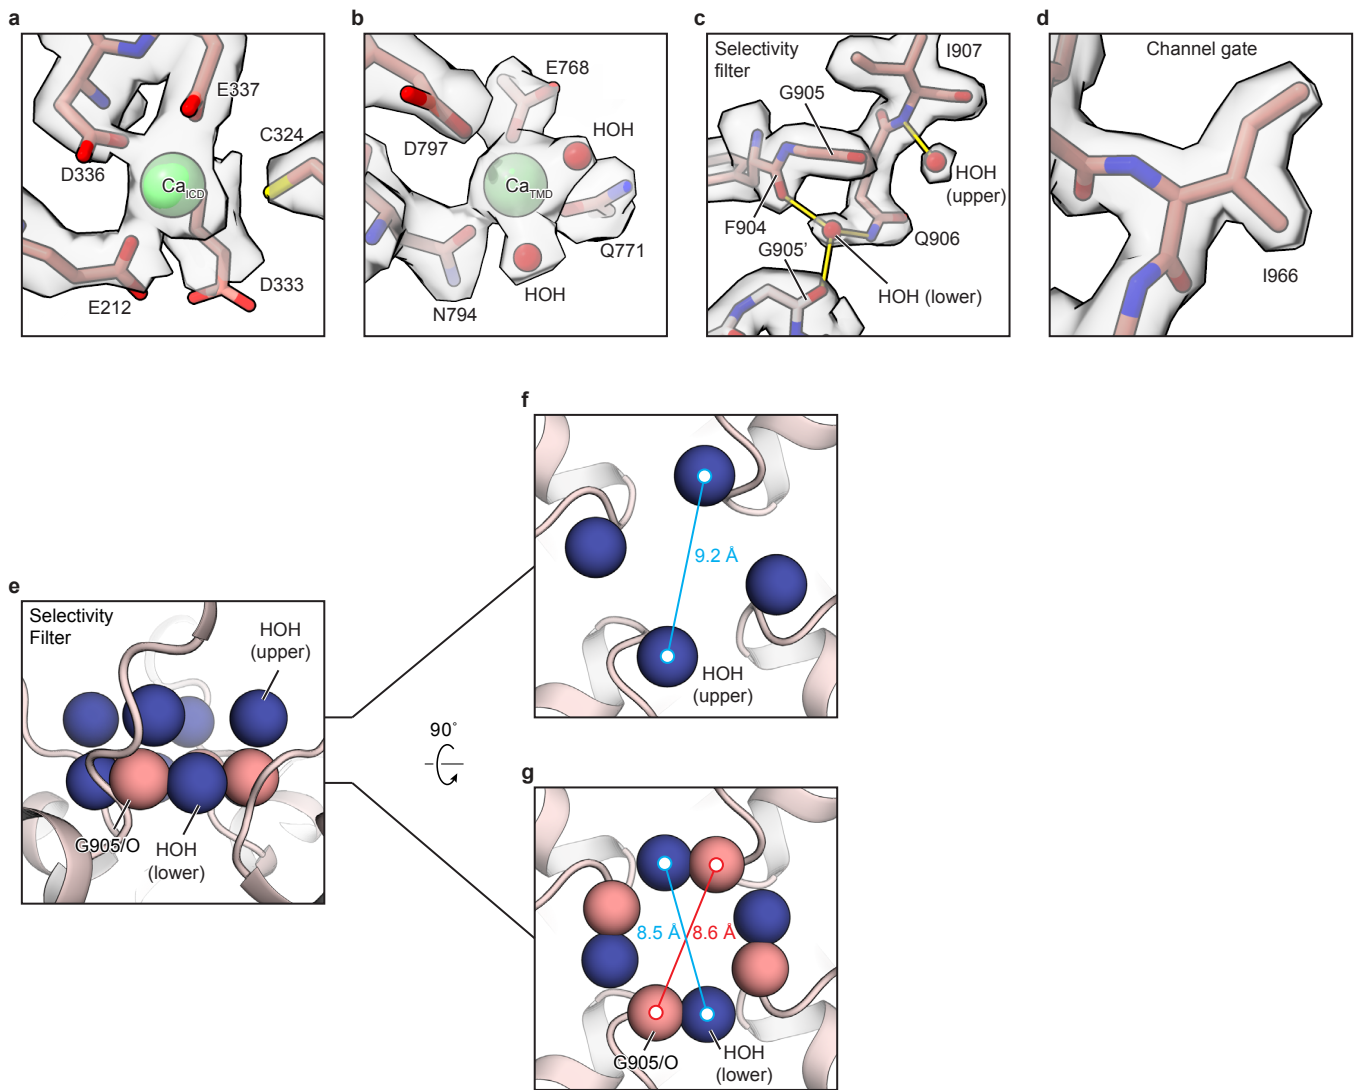

# ED Fig. 8

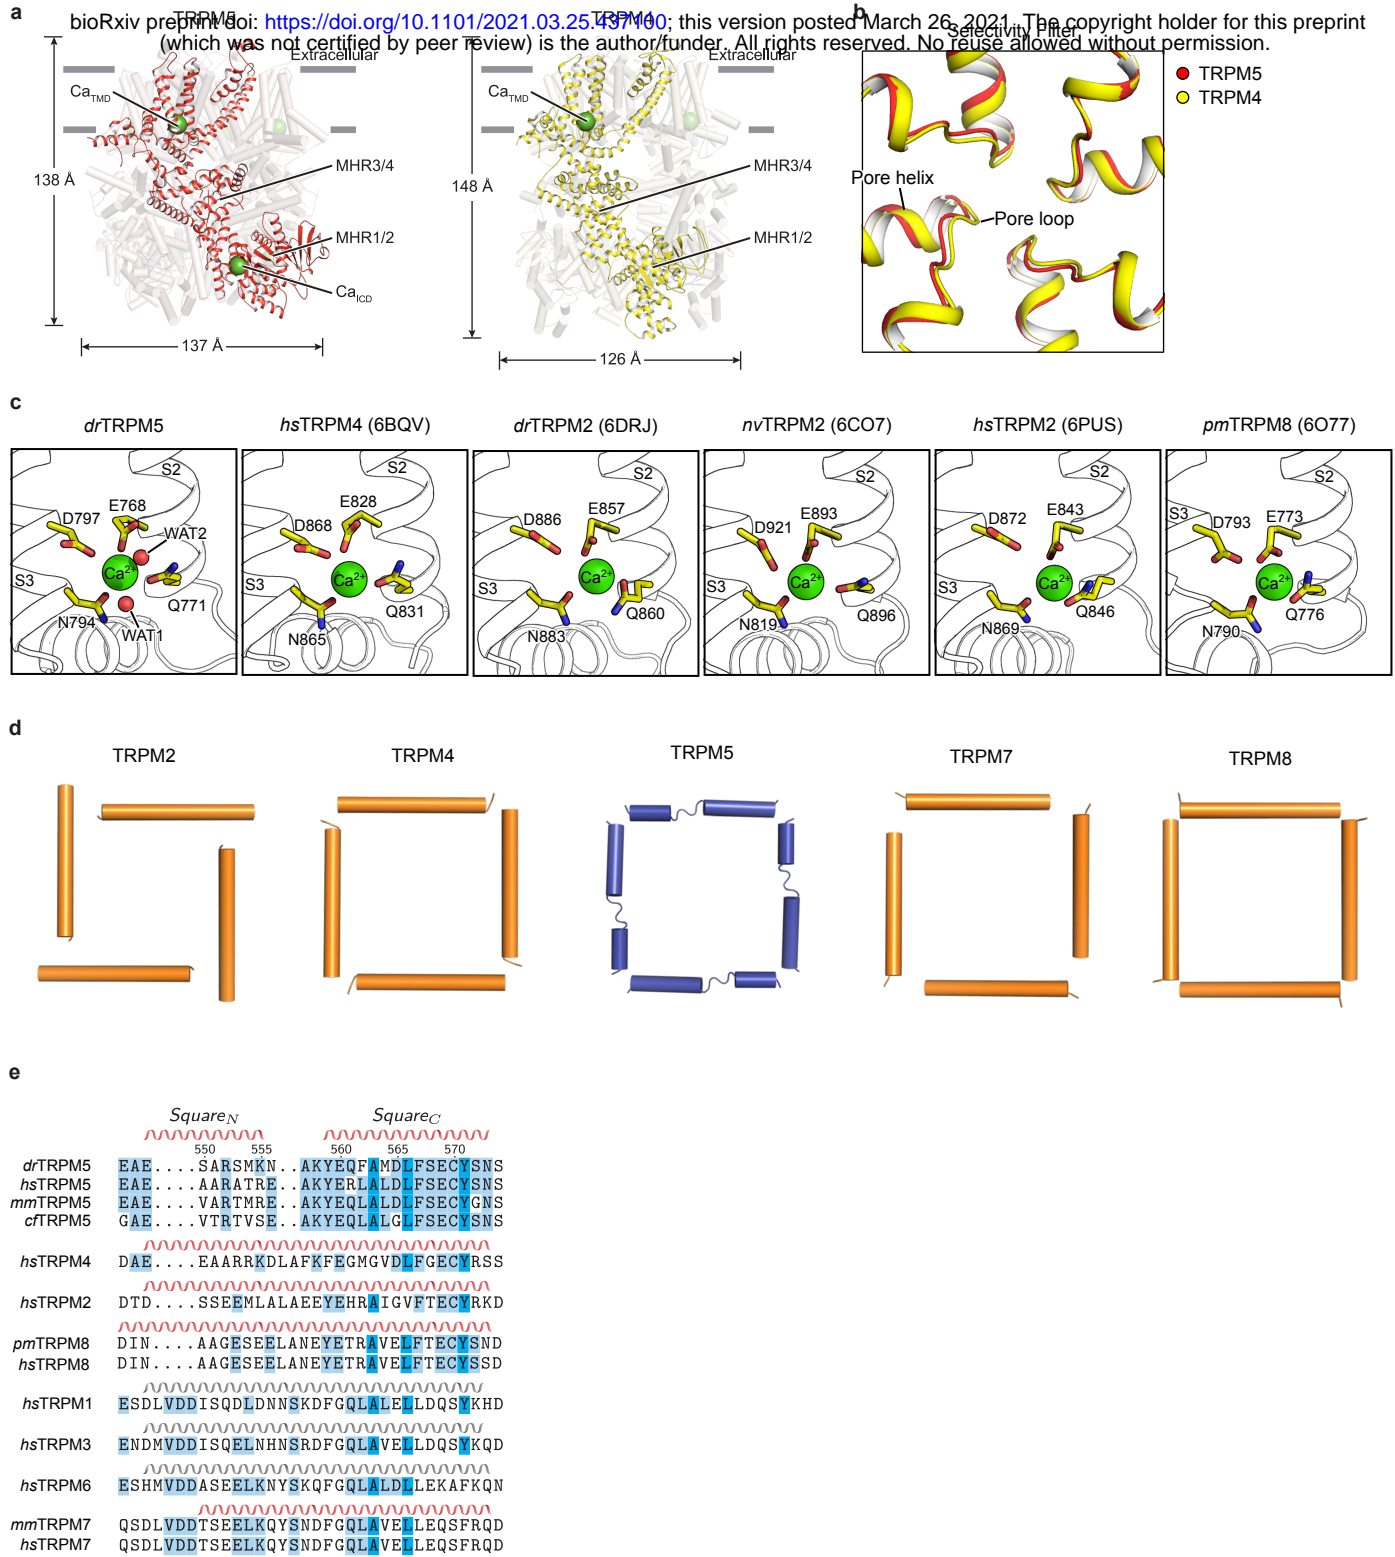

# ED Figure 9

bioRxiv preprint doi: <https://doi.org/10.1101/2021.03.25.437100>; this version posted March 26, 2021. The copyright holder for this preprint (which was not certified by peer review) is the author/funder. All rights reserved. No reuse allowed without permission.

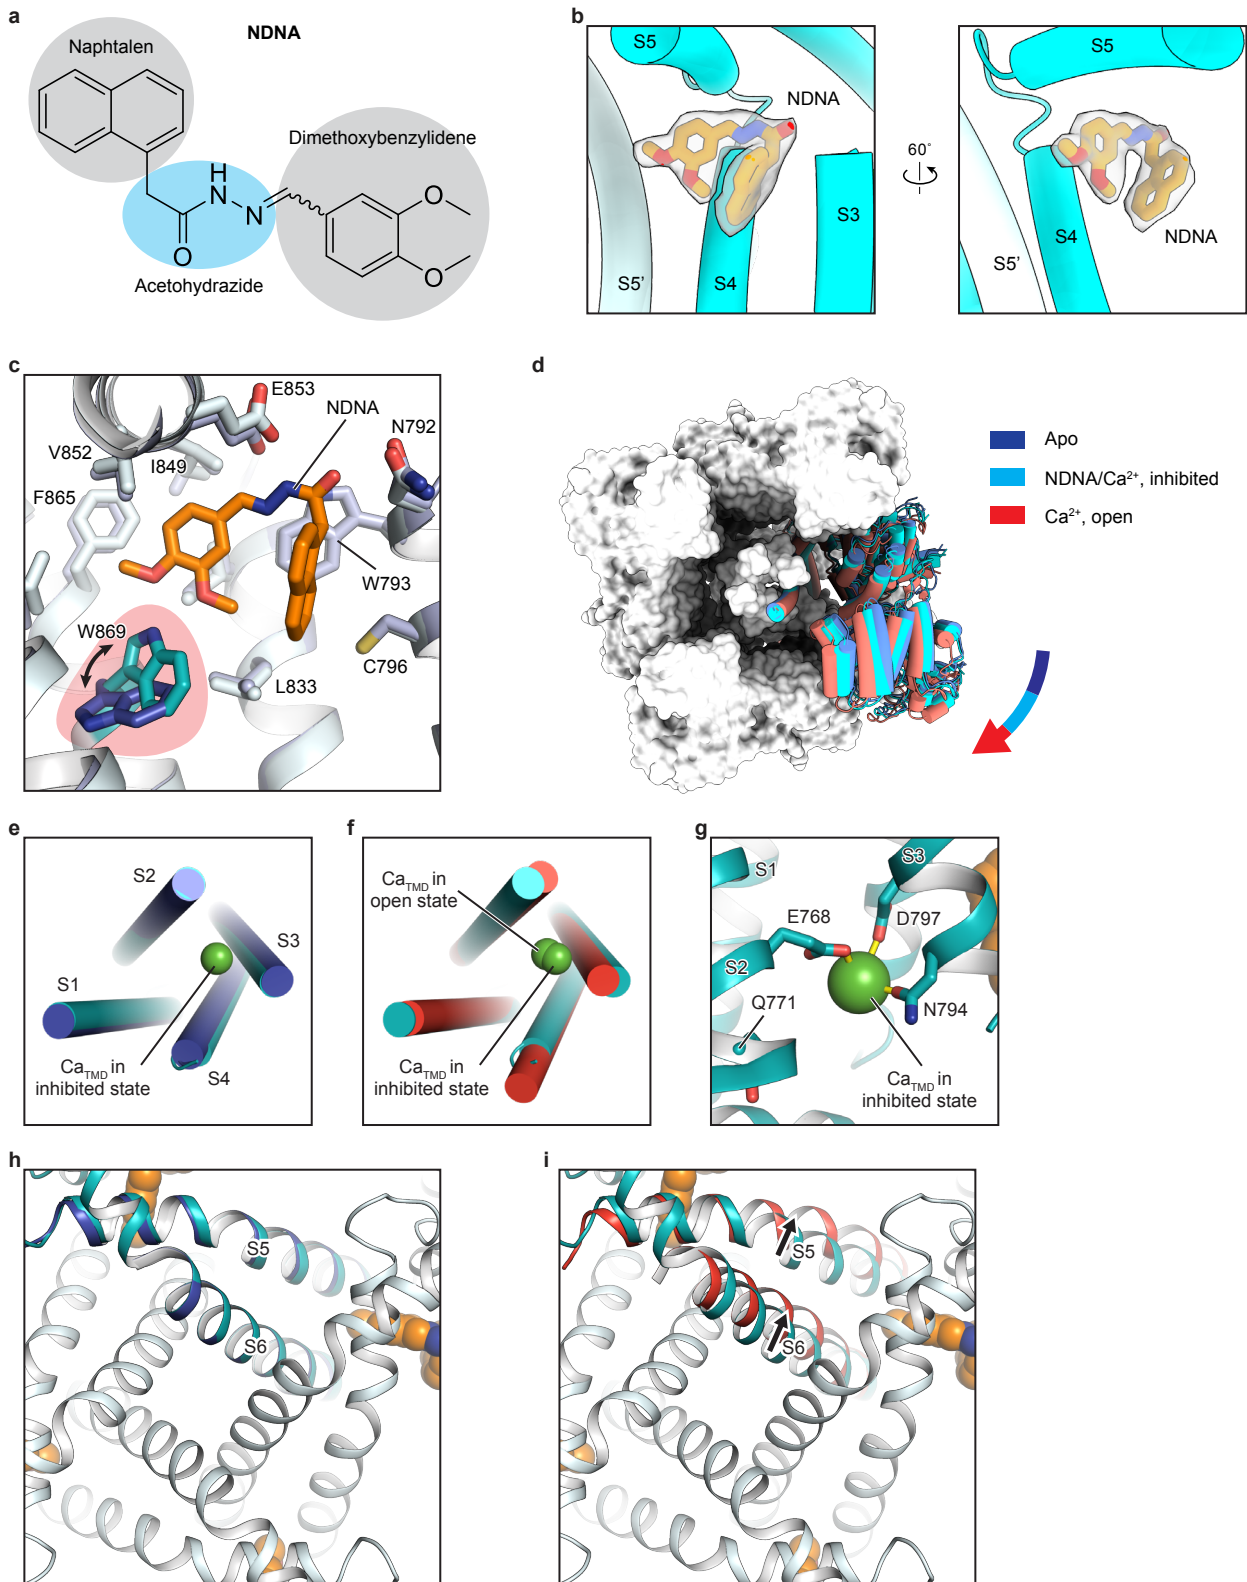





## ED Fig. 11

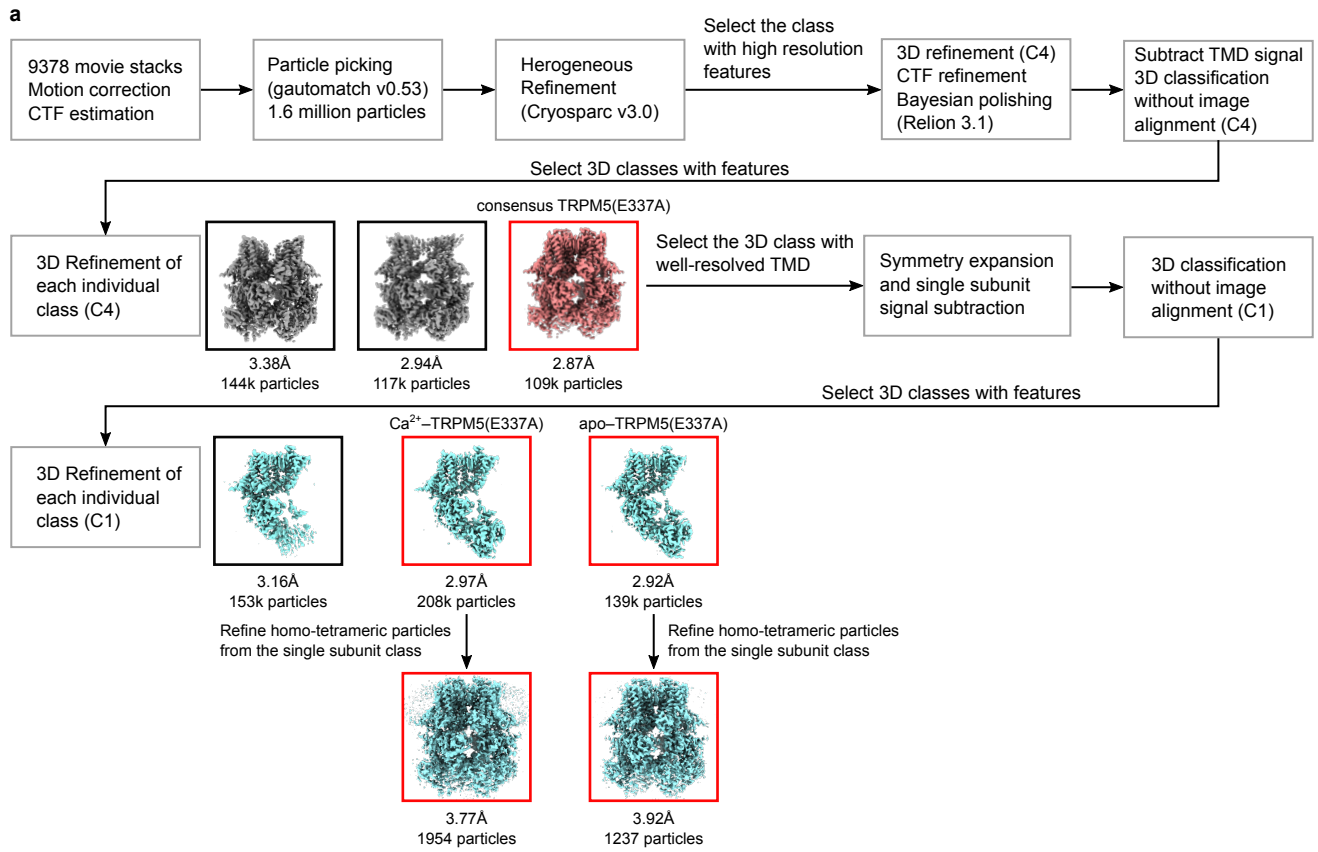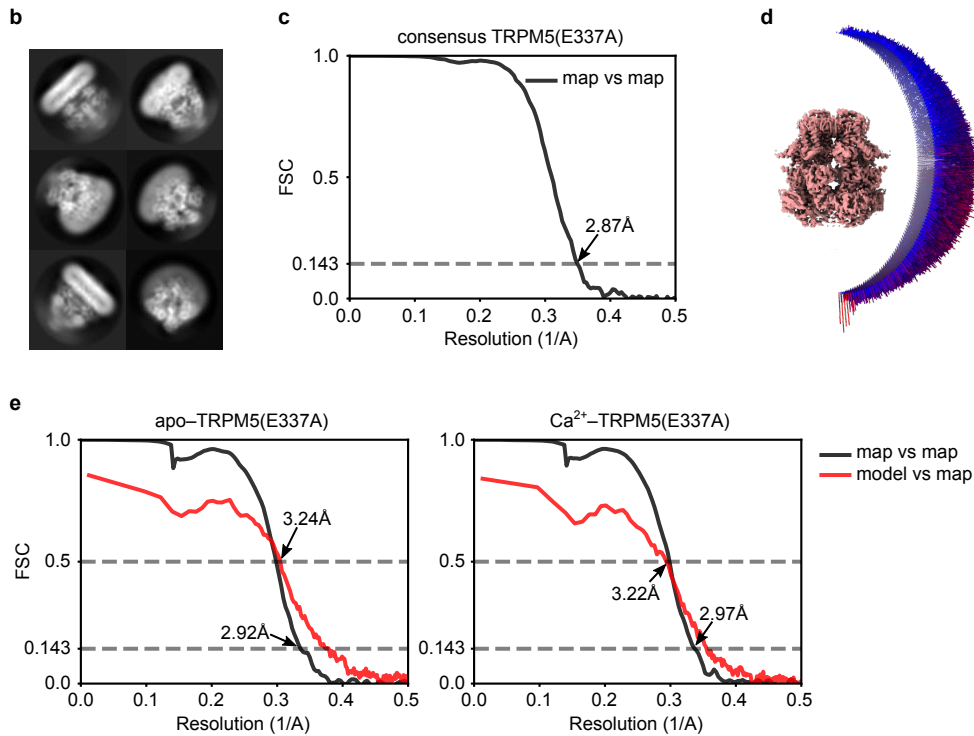

## Extended Data Table 1: Cryo-EM data collection, refinement and validation statistics

bioRxiv preprint doi: <https://doi.org/10.1101/2021.03.25.437100>; this version posted March 26, 2021. The copyright holder for this preprint (which was not certified by peer review) is the author/funder. All rights reserved. No reuse allowed without permission.

|                                                     | Apo-TRPM5      | Ca <sup>2+</sup> -TRPM5 | Apo-TRPM5 (nanodisc) | Ca <sup>2+</sup> -TRPM5 (nanodisc) |
|-----------------------------------------------------|----------------|-------------------------|----------------------|------------------------------------|
| <b>Data collection and processing</b>               |                |                         |                      |                                    |
| Magnification                                       | 130,000        | 105,000                 | 130,000              | 130,000                            |
| Voltage (kV)                                        | 300            | 300                     | 300                  | 300                                |
| Electron exposure (e <sup>-</sup> /Å <sup>2</sup> ) | 49.6           | 47                      | 49.6                 | 49.6                               |
| Defocus range (µm)                                  | -0.9 – -1.9    | -0.9 – -1.9             | -0.9 – -1.9          | -0.9 – -1.9                        |
| Pixel size (Å)                                      | 1.042          | 0.826                   | 1.042                | 1.042                              |
| Symmetry imposed                                    | C4             | C4                      | C4                   | C4                                 |
| Initial particle images (no.)                       | 750k           | 2,300k                  | 203k                 | 794k                               |
| Final particle images (no.)                         | 84k            | 292k                    | 13k                  | 44k                                |
| Map resolution (Å)                                  | 2.84           | 2.34                    | 3.60                 | 3.06                               |
| FSC threshold                                       | 0.143          | 0.143                   | 0.143                | 0.143                              |
| Map resolution range (Å)                            | 2.95 – 246.2   | 2.34 – 246.2            | 3.60 – 246.2         | 3.06 – 246.2                       |
| <b>Refinement</b>                                   |                |                         |                      |                                    |
| Initial model used (PDB code)                       | <i>De novo</i> | <i>De novo</i>          |                      |                                    |
| Model resolution (Å)                                | 3.14           | 2.51                    |                      |                                    |
| FSC threshold                                       | 0.5            | 0.5                     |                      |                                    |
| Map sharpening <i>B</i> factor (Å <sup>2</sup> )    | -70.22         | -43.99                  |                      |                                    |
| Model composition                                   |                |                         |                      |                                    |
| Non-hydrogen atoms                                  | 30708          | 30684                   |                      |                                    |
| Protein residues                                    | 3984           | 3984                    |                      |                                    |
| Ligands                                             | 12             | 32                      |                      |                                    |
| R.m.s. deviations                                   |                |                         |                      |                                    |
| Bond lengths (Å)                                    | 0.186          | 0.19                    |                      |                                    |
| Bond angles (°)                                     | 1.039          | 1.053                   |                      |                                    |
| Validation                                          |                |                         |                      |                                    |
| MolProbity score                                    | 1.51           | 1.61                    |                      |                                    |
| Clashscore                                          | 6.32           | 6.23                    |                      |                                    |
| Poor rotamers (%)                                   | 0.00           | 0.00                    |                      |                                    |
| Ramachandran plot                                   |                |                         |                      |                                    |
| Favored (%)                                         | 97.06          | 96.10                   |                      |                                    |
| Allowed (%)                                         | 2.94           | 3.90                    |                      |                                    |
| Disallowed (%)                                      | 0.00           | 0.00                    |                      |                                    |

|                                                     | <b>Ca<sup>2+</sup>-TRPM5(E337A)<br/>consensus</b> | <b>Apo-TRPM5(E337A)<br/>subunit</b> | <b>Ca<sup>2+</sup>-TRPM5(E337A)<br/>subunit</b> |
|-----------------------------------------------------|---------------------------------------------------|-------------------------------------|-------------------------------------------------|
| <b>Data collection and processing</b>               |                                                   |                                     |                                                 |
| Magnification                                       | 105,000                                           | 105,000                             | 105,000                                         |
| Voltage (kV)                                        | 300                                               | 300                                 | 300                                             |
| Electron exposure (e <sup>-</sup> /Å <sup>2</sup> ) | 47                                                | 47                                  | 47                                              |
| Defocus range (µm)                                  | -0.9 – -1.9                                       | -0.9 – -1.9                         | -0.9 – -1.9                                     |
| Pixel size (Å)                                      | 0.826                                             | 0.826                               | 0.826                                           |
| Symmetry imposed                                    | C4                                                | C1                                  | C1                                              |
| Initial particle images (no.)                       | 1,600k                                            |                                     |                                                 |
| Final particle images (no.)                         | 72k                                               | 208k                                | 139k                                            |
| Map resolution (Å)                                  | 2.92                                              | 2.92                                | 2.97                                            |
| FSC threshold                                       | 0.143                                             | 0.143                               | 0.143                                           |
| Map resolution range (Å)                            | 2.92 – 246.2                                      | 2.92 – 246.2                        | 2.97 – 246.2                                    |
| <b>Refinement</b>                                   |                                                   |                                     |                                                 |
| Initial model used (PDB code)                       |                                                   | <i>De novo</i>                      | <i>De novo</i>                                  |
| Model resolution (Å)                                |                                                   | 3.24                                | 3.22                                            |
| FSC threshold                                       |                                                   | 0.5                                 | 0.5                                             |
| Map sharpening <i>B</i> factor (Å <sup>2</sup> )    |                                                   | -70.89                              | -70.72                                          |
| Model composition                                   |                                                   |                                     |                                                 |
| Non-hydrogen atoms                                  |                                                   | 30760                               | 30780                                           |
| Protein residues                                    |                                                   | 3984                                | 3984                                            |
| Ligands                                             |                                                   | 12                                  | 16                                              |
| R.m.s. deviations                                   |                                                   |                                     |                                                 |
| Bond lengths (Å)                                    |                                                   | 0.189                               | 0.190                                           |
| Bond angles (°)                                     |                                                   | 1.041                               | 1.08                                            |
| Validation                                          |                                                   |                                     |                                                 |
| MolProbity score                                    |                                                   | 1.72                                | 1.85                                            |
| Clashscore                                          |                                                   | 9.33                                | 11.6                                            |
| Poor rotamers (%)                                   |                                                   | 0.00                                | 0.00                                            |
| Ramachandran plot                                   |                                                   |                                     |                                                 |
| Favored (%)                                         |                                                   | 96.55                               | 95.99                                           |
| Allowed (%)                                         |                                                   | 3.45                                | 4.01                                            |
| Disallowed (%)                                      |                                                   | 0.00                                | 0.00                                            |

---

|  | NDNA/Ca <sup>2+</sup> -TRPM5 | Apo-TRPM5(6μM Ca <sup>2+</sup> ) | Ca <sup>2+</sup> -TRPM5(6μM Ca <sup>2+</sup> ) |
|--|------------------------------|----------------------------------|------------------------------------------------|
|--|------------------------------|----------------------------------|------------------------------------------------|

---

**Data collection and processing** <https://doi.org/10.1101/2021.03.25.437100>; this version posted March 26, 2021. The copyright holder for this preprint (which was not certified by peer review) is the author/funder. All rights reserved. No reuse allowed without permission.

|                                                     |              |              |              |
|-----------------------------------------------------|--------------|--------------|--------------|
| Magnification                                       | 105,000      | 130,000      | 130,000      |
| Voltage (kV)                                        | 300          | 300          | 300          |
| Electron exposure (e <sup>-</sup> /Å <sup>2</sup> ) | 47           | 49.6         | 49.6         |
| Defocus range (μm)                                  | -0.9 – -1.9  | -0.9 – -1.9  | -0.9 – -1.9  |
| Pixel size (Å)                                      | 0.826        | 1.042        | 1.042        |
| Symmetry imposed                                    | C4           | C4           | C4           |
| Initial particle images (no.)                       | 1,400k       | 637k         | 637k         |
| Final particle images (no.)                         | 109k         | 32k          | 23k          |
| Map resolution (Å)                                  | 2.83         | 3.51         | 3.47         |
| FSC threshold                                       | 0.143        | 0.143        | 0.143        |
| Map resolution range (Å)                            | 2.83 – 246.2 | 3.51 – 246.2 | 3.47 – 246.2 |

### Refinement

|                                                  |                |         |         |
|--------------------------------------------------|----------------|---------|---------|
| Initial model used (PDB code)                    | <i>De novo</i> |         |         |
| Model resolution (Å)                             | 3.28           |         |         |
| FSC threshold                                    | 0.5            |         |         |
| Map sharpening <i>B</i> factor (Å <sup>2</sup> ) | -75.36         | -117.99 | -104.77 |
| Model composition                                |                |         |         |
| Non-hydrogen atoms                               | 30804          |         |         |
| Protein residues                                 | 3984           |         |         |
| Ligands                                          | 24             |         |         |
| R.m.s. deviations                                |                |         |         |
| Bond lengths (Å)                                 | 0.2855         |         |         |
| Bond angles (°)                                  | 1.46           |         |         |
| Validation                                       |                |         |         |
| MolProbity score                                 | 1.45           |         |         |
| Clashscore                                       | 6.90           |         |         |
| Poor rotamers (%)                                | 0.00           |         |         |
| Ramachandran plot                                |                |         |         |
| Favored (%)                                      | 97.69          |         |         |
| Allowed (%)                                      | 2.31           |         |         |
| Disallowed (%)                                   | 0.00           |         |         |

---
